# Supplementary material for: Combinatorial Gene Expression Profiling of Serum HULC, HOTAIR, and UCA1 lncRNAs to Differentiate Hepatocellular Carcinoma from Liver Diseases: A Systematic Review and Meta-Analysis
Source: MDPI journal article supplement (doi:10.3390/ijms25021258), 2024-01-19
Supplement: s1 [file s1]

**Table S1 PRISMA 2020 checklist**

| Section and Topic             | Item # | Checklist item                                                                                                                                                                                                                                                                                       | Location where item is reported |
|-------------------------------|--------|------------------------------------------------------------------------------------------------------------------------------------------------------------------------------------------------------------------------------------------------------------------------------------------------------|---------------------------------|
| <b>TITLE</b>                  |        |                                                                                                                                                                                                                                                                                                      |                                 |
| Title                         | 1      | Identify the report as a systematic review.                                                                                                                                                                                                                                                          | Title page                      |
| <b>ABSTRACT</b>               |        |                                                                                                                                                                                                                                                                                                      |                                 |
| Abstract                      | 2      | See the PRISMA 2020 for Abstracts checklist.                                                                                                                                                                                                                                                         | Line 32                         |
| <b>INTRODUCTION</b>           |        |                                                                                                                                                                                                                                                                                                      |                                 |
| Rationale                     | 3      | Describe the rationale for the review in the context of existing knowledge.                                                                                                                                                                                                                          | Line 106                        |
| Objectives                    | 4      | Provide an explicit statement of the objective(s) or question(s) the review addresses.                                                                                                                                                                                                               | Line 109                        |
| <b>METHODS</b>                |        |                                                                                                                                                                                                                                                                                                      |                                 |
| Eligibility criteria          | 5      | Specify the inclusion and exclusion criteria for the review and how studies were grouped for the syntheses.                                                                                                                                                                                          | Line 134                        |
| Information sources           | 6      | Specify all databases, registers, websites, organisations, reference lists and other sources searched or consulted to identify studies. Specify the date when each source was last searched or consulted.                                                                                            | Line 128                        |
| Search strategy               | 7      | Present the full search strategies for all databases, registers and websites, including any filters and limits used.                                                                                                                                                                                 | Supplement table S2-4           |
| Selection process             | 8      | Specify the methods used to decide whether a study met the inclusion criteria of the review, including how many reviewers screened each record and each report retrieved, whether they worked independently, and if applicable, details of automation tools used in the process.                     | Line 132                        |
| Data collection process       | 9      | Specify the methods used to collect data from reports, including how many reviewers collected data from each report, whether they worked independently, any processes for obtaining or confirming data from study investigators, and if applicable, details of automation tools used in the process. | Line 152                        |
| Data items                    | 10a    | List and define all outcomes for which data were sought. Specify whether all results that were compatible with each outcome domain in each study were sought (e.g. for all measures, time points, analyses), and if not, the methods used to decide which results to collect.                        | Line 142                        |
|                               | 10b    | List and define all other variables for which data were sought (e.g. participant and intervention characteristics, funding sources). Describe any assumptions made about any missing or unclear information.                                                                                         | Line 154                        |
| Study risk of bias assessment | 11     | Specify the methods used to assess risk of bias in the included studies, including details of the tool(s) used, how many reviewers assessed each study and whether they worked independently, and if applicable, details of automation tools used in the process.                                    | Line 164                        |
| Effect measures               | 12     | Specify for each outcome the effect measure(s) (e.g. risk ratio, mean difference) used in the synthesis or presentation of results.                                                                                                                                                                  | Line 175                        |

| Section and Topic             | Item # | Checklist item                                                                                                                                                                                                                                              | Location where item is reported |
|-------------------------------|--------|-------------------------------------------------------------------------------------------------------------------------------------------------------------------------------------------------------------------------------------------------------------|---------------------------------|
| Synthesis methods             | 13a    | Describe the processes used to decide which studies were eligible for each synthesis (e.g. tabulating the study intervention characteristics and comparing against the planned groups for each synthesis (item #5)).                                        | Line 134                        |
|                               | 13b    | Describe any methods required to prepare the data for presentation or synthesis, such as handling of missing summary statistics, or data conversions.                                                                                                       | Line 157                        |
|                               | 13c    | Describe any methods used to tabulate or visually display results of individual studies and syntheses.                                                                                                                                                      | Line 167                        |
|                               | 13d    | Describe any methods used to synthesize results and provide a rationale for the choice(s). If meta-analysis was performed, describe the model(s), method(s) to identify the presence and extent of statistical heterogeneity, and software package(s) used. | Line 176                        |
|                               | 13e    | Describe any methods used to explore possible causes of heterogeneity among study results (e.g. subgroup analysis, meta-regression).                                                                                                                        | Line 178                        |
|                               | 13f    | Describe any sensitivity analyses conducted to assess robustness of the synthesized results.                                                                                                                                                                |                                 |
| Reporting bias assessment     | 14     | Describe any methods used to assess risk of bias due to missing results in a synthesis (arising from reporting biases).                                                                                                                                     | Line 184                        |
| Certainty assessment          | 15     | Describe any methods used to assess certainty (or confidence) in the body of evidence for an outcome.                                                                                                                                                       | NA                              |
| <b>RESULTS</b>                |        |                                                                                                                                                                                                                                                             |                                 |
| Study selection               | 16a    | Describe the results of the search and selection process, from the number of records identified in the search to the number of studies included in the review, ideally using a flow diagram.                                                                | Line 188                        |
|                               | 16b    | Cite studies that might appear to meet the inclusion criteria, but which were excluded, and explain why they were excluded.                                                                                                                                 | Supplement table S5             |
| Study characteristics         | 17     | Cite each included study and present its characteristics.                                                                                                                                                                                                   | Supplement table S6             |
| Risk of bias in studies       | 18     | Present assessments of risk of bias for each included study.                                                                                                                                                                                                | Supplement table S8             |
| Results of individual studies | 19     | For all outcomes, present, for each study: (a) summary statistics for each group (where appropriate) and (b) an effect estimate and its precision (e.g. confidence/credible interval), ideally using structured tables or plots.                            | Figure 3                        |
| Results of syntheses          | 20a    | For each synthesis, briefly summarise the characteristics and risk of bias among contributing studies.                                                                                                                                                      | Table 1, Figure 2               |
|                               | 20b    | Present results of all statistical syntheses conducted. If meta-analysis was done, present for each the summary estimate and its precision (e.g. confidence/credible interval) and measures of statistical                                                  | Figure 3-5                      |

| Section and Topic                              | Item # | Checklist item                                                                                                                                                                                                                             | Location where item is reported |
|------------------------------------------------|--------|--------------------------------------------------------------------------------------------------------------------------------------------------------------------------------------------------------------------------------------------|---------------------------------|
|                                                |        | heterogeneity. If comparing groups, describe the direction of the effect.                                                                                                                                                                  |                                 |
|                                                | 20c    | Present results of all investigations of possible causes of heterogeneity among study results.                                                                                                                                             | NA                              |
|                                                | 20d    | Present results of all sensitivity analyses conducted to assess the robustness of the synthesized results.                                                                                                                                 |                                 |
| Reporting biases                               | 21     | Present assessments of risk of bias due to missing results (arising from reporting biases) for each synthesis assessed.                                                                                                                    | NA                              |
| Certainty of evidence                          | 22     | Present assessments of certainty (or confidence) in the body of evidence for each outcome assessed.                                                                                                                                        | NA                              |
| <b>DISCUSSION</b>                              |        |                                                                                                                                                                                                                                            |                                 |
| Discussion                                     | 23a    | Provide a general interpretation of the results in the context of other evidence.                                                                                                                                                          | Line 296                        |
|                                                | 23b    | Discuss any limitations of the evidence included in the review.                                                                                                                                                                            | Line 354                        |
|                                                | 23c    | Discuss any limitations of the review processes used.                                                                                                                                                                                      | Line 361                        |
|                                                | 23d    | Discuss implications of the results for practice, policy, and future research.                                                                                                                                                             | Line 380                        |
| <b>OTHER INFORMATION</b>                       |        |                                                                                                                                                                                                                                            |                                 |
| Registration and protocol                      | 24a    | Provide registration information for the review, including register name and registration number, or state that the review was not registered.                                                                                             | Line 118                        |
|                                                | 24b    | Indicate where the review protocol can be accessed, or state that a protocol was not prepared.                                                                                                                                             | Line 118                        |
|                                                | 24c    | Describe and explain any amendments to information provided at registration or in the protocol.                                                                                                                                            | NA                              |
| Support                                        | 25     | Describe sources of financial or non-financial support for the review, and the role of the funders or sponsors in the review.                                                                                                              | Funding section                 |
| Competing interests                            | 26     | Declare any competing interests of review authors.                                                                                                                                                                                         | Declare section                 |
| Availability of data, code and other materials | 27     | Report which of the following are publicly available and where they can be found: template data collection forms; data extracted from included studies; data used for all analyses; analytic code; any other materials used in the review. | Cite as Supplement              |

From: Page MJ, McKenzie JE, Bossuyt PM, Boutron I, Hoffmann TC, Mulrow CD, et al. The PRISMA 2020 statement: an updated guideline for reporting systematic reviews. BMJ 2021;372:n71.

**Table S2 Searching strategies: PubMed (December 7, 2022)**

| Database            | Step | Search algorithm                                     | Items found |
|---------------------|------|------------------------------------------------------|-------------|
| <b>Pubmed</b>       |      |                                                      |             |
| MeSH                | #1   | Liver neoplasm                                       | 188,262     |
|                     | #2   | Adenoma, liver cell                                  | 1,011       |
|                     | #3   | Carcinoma, hepatocellular                            | 100,950     |
|                     | #4   | Liquid biopsy                                        | 11,024      |
|                     | #5   | RNA, long noncoding                                  | 30,400      |
|                     | #6   | #1 OR #2 OR #3 OR #4 OR #5                           | 227,757     |
| Domain / population | #7   | Liver cancer                                         | 312,791     |
|                     | #8   | Hepatocellular carcinoma                             | 141,317     |
|                     | #9   | Liver cell carcinoma                                 | 156,892     |
|                     | #10  | #7 OR #8 OR #9                                       | 341,629     |
| Determinants        | #11  | Long untranslated rna                                | 45,519      |
|                     | #12  | Long noncoding rna                                   | 43,054      |
|                     | #13  | lncRNA                                               | 48,219      |
|                     | #14  | #11 OR #12 OR #13                                    | 50,674      |
| Procedures          | #15  | Circulat*                                            | 703,005     |
|                     | #16  | Plasma                                               | 1,028,936   |
|                     | #17  | serum                                                | 1,243,795   |
|                     | #18  | blood                                                | 5,363,064   |
|                     | #19  | urine                                                | 410,823     |
|                     | #20  | Bile                                                 | 157,903     |
|                     | #21  | Non invasive testing                                 | 31,586      |
|                     | #22  | biopsy                                               | 4,196,129   |
|                     | #23  | #15 OR #16 OR #17 OR #18 OR #19 OR #20 OR #21 OR #22 | 9,824,962   |
| Study               | #24  | Prognos*                                             | 1,048,289   |
|                     | #25  | Diagnos*                                             | 5,959,438   |
|                     | #26  | association                                          | 5,613,472   |
|                     | #27  | Predicti*                                            | 1,069,090   |
|                     | #28  | #24 OR #25 OR #26 OR #27                             | 10,998,184  |
| Combine             | #31  | #6 AND #10 AND #14 AND #23 AND #28                   | 1,262       |

**Table S3 Searching strategies: EMBASE (December 7, 2022)**

| Database            | Step | Search algorithm                                    | Items found |
|---------------------|------|-----------------------------------------------------|-------------|
| <b>EMBASE</b>       |      |                                                     |             |
| Domain / population | #1   | Liver cancer                                        | 563,739     |
|                     | #2   | Hepatocellular carcinoma                            | 166,834     |
|                     | #3   | Liver cell carcinoma                                | 197,398     |
|                     | #4   | #1 OR #2 OR #3                                      | 579,806     |
| Determinants        | #5   | Long untranslated rna                               | 47,695      |
|                     | #6   | Long noncoding rna                                  | 44,612      |
|                     | #7   | lncRNA                                              | 32,353      |
|                     | #8   | #5 OR #6 OR #7                                      | 56,793      |
| Procedures          | #9   | Circulat*                                           | 931,373     |
|                     | #10  | Plasma                                              | 1,410,541   |
|                     | #11  | serum                                               | 1,652,776   |
|                     | #12  | blood                                               | 5,936,537   |
|                     | #13  | urine                                               | 608,758     |
|                     | #14  | Bile                                                | 256,129     |
|                     | #15  | Non invasive testing                                | 19,668      |
|                     | #16  | biopsy                                              | 1,030,861   |
|                     | #17  | #9 OR #10 OR #11 OR #12 OR #13 OR #14 OR #15 OR #16 | 8,790,301   |
| Study               | #18  | Prognos*                                            | 1,404,636   |
|                     | #19  | Diagnos*                                            | 7,856,633   |
|                     | #20  | association                                         | 5,001,702   |
|                     | #21  | Predicti*                                           | 1,514,374   |
|                     | #22  | #18 OR #19 OR #20 OR #21                            | 12,907,694  |
| Combine             | #23  | #4 AND #8 AND #17 AND #22                           | 725         |

**Table S4 Searching strategies: Scopus (December 8, 2022)**

| Database      | Step | Search algorithm                                                                    | Items found |
|---------------|------|-------------------------------------------------------------------------------------|-------------|
| <b>Scopus</b> |      |                                                                                     |             |
| Domain        | #1   | (Hepatocellular AND carcinoma)                                                      | 585,528     |
|               | #2   | ( human AND liver AND cancer )                                                      | 1,375,022   |
| Determinants  | #3   | (long AND noncoding AND RNA) OR (lncRNA) OR (untranslated AND rna)                  | 245,955     |
| Procedures    | #4   | ( circulating AND rna ) OR ( liquid AND biopsy ) OR ( non AND invasive AND biopsy ) | 368,724     |
| study         | #5   | (diagnosis) OR (prognosis)                                                          | 8,612,372   |
|               | #6   | #1 AND #2 AND #3 AND #4                                                             | 6,123       |
|               | #7   | Article only                                                                        | 2,638       |
|               | #8   | English only                                                                        | 2,596       |

**Table S5 Articles that were unretrievable and excluded**

| ID    | Author      | Year | Title                                                                                                                                                                                                                        | Journal                              | Retrieve (Y/N) | Include/Exclude | Reasons for exclusion |                                     |
|-------|-------------|------|------------------------------------------------------------------------------------------------------------------------------------------------------------------------------------------------------------------------------|--------------------------------------|----------------|-----------------|-----------------------|-------------------------------------|
| P_001 | Yang Z      | 2011 | Overexpression of long non-coding RNA HOTAIR predicts tumor recurrence in hepatocellular carcinoma patients following liver transplantation                                                                                  | Ann Surg Oncol                       | Y              | Excluded        | 1                     | tissue                              |
| P_002 | Yuan SX     | 2012 | Long noncoding RNA associated with microvascular invasion in hepatocellular carcinoma promotes angiogenesis and serves as a predictor for hepatocellular carcinoma patients' poor recurrence-free survival after hepatectomy | Hepatology                           | Y              | Excluded        | 1                     | tissue, no control                  |
| P_006 | Quagliata L | 2015 | HOTTIP expression is associated with metastasis formation, predicts outcome and is altered in plasma samples of hepatocellular carcinoma patients                                                                            | Clinical and Experimental Metastasis | Y              | Excluded        | 1                     | tissue                              |
| P_009 | Yan IK      | 2015 | Identification of candidate extracellular non-coding RNA biomarkers for Hepatocellular Carcinoma                                                                                                                             | Hepatology                           | Y              | Excluded        | 6                     | Poster_384                          |
| P_012 | Fu N        | 2016 | Role of LncRNA-activated by transforming growth factor beta in the progression of hepatitis C virus-related liver fibrosis                                                                                                   | Discov Med                           | Y              | Excluded        | 1                     | HCV, not HCC                        |
| P_018 | Zhuang LK   | 2016 | MicroRNA-92b promotes hepatocellular carcinoma progression by targeting Smad7 and is mediated by long non-coding RNA XIST                                                                                                    | Cell Death Dis                       | Y              | Excluded        | 1                     | miRNA mechanism                     |
| P_021 | Fang C      | 2017 | Long non-coding ribonucleic acid zinc finger antisense 1 promotes the progression of colonic cancer by modulating ZEB1 expression                                                                                            | J Gastroenterol Hepatol              | Y              | Excluded        | 1                     | Colon Cancer                        |
| P_022 | Liu Z       | 2017 | Long non-coding RNA NEAT1 overexpression is associated with unfavorable prognosis in patients with hepatocellular carcinoma after hepatectomy: A Chinese population-based study                                              | Eur J Surg Oncol                     | Y              | Excluded        | 1                     | Tissue                              |
| P_025 | Wang C      | 2017 | Identification of long non-coding RNA p34822 as a potential plasma biomarker for the diagnosis of hepatocellular carcinoma                                                                                                   | Sci China Life Sci                   | Y              | Excluded        | 11                    | Letter to editor                    |
| P_032 | Hu ML       | 2018 | TGF- $\beta$ 1 upregulates the expression of lncRNA UCA1 and its downstream HXK2 to promote the growth of hepatocellular carcinoma                                                                                           | Eur Rev Med Pharmacol Sci            | Y              | Excluded        | 5                     | No raw data available, only KM plot |
| P_037 | Topel H     | 2018 | HGF/C-met signalling pathway downregulates lncRNA hotair to induce adhesion independent growth in HCC by increasing caveolin-1 expression                                                                                    | ESMO Open                            | Y              | Excluded        | 6                     | Poster                              |
| P_042 | Yu ML       | 2018 | Identification of circulating exosomal long non-coding RNA, DANCR, as liquid biopsy for prognostic markers of                                                                                                                | Hepatology                           | Y              | Excluded        | 6                     | Oral present abstract               |

| ID    | Author             | Year | Title                                                                                                                                                                           | Journal                       | Retrieve (Y/N) | Include/Exclude | Reasons for exclusion |                                                              |
|-------|--------------------|------|---------------------------------------------------------------------------------------------------------------------------------------------------------------------------------|-------------------------------|----------------|-----------------|-----------------------|--------------------------------------------------------------|
|       |                    |      | hepatitis C virus-related hepatocellular carcinoma after surgical resection                                                                                                     |                               |                |                 |                       |                                                              |
| P_044 | Zhang C            | 2018 | lncRNA-HEIH in serum and exosomes as a potential biomarker in the HCV-related hepatocellular carcinoma                                                                          | Cancer Biomark                | Y              | Excluded        | 2                     | no ROC, only relative expression level in graph              |
| P_047 | Burerina O         | 2019 | Novel long non-coding RNA as a potential biomarker of liver cancer                                                                                                              | FEBS Open Bio                 | Y              | Excluded        | 6                     | Conference abstract                                          |
| P_050 | De los Angel Rojas | 2019 | Droplet digital pcr analysis of circulating lncrna H19: A potential biomarker for hepatocellular carcinoma                                                                      | Hepatology                    | Y              | Excluded        | 6                     | Poster 2040                                                  |
| P_054 | Ma J               | 2019 | A Noninvasive Prediction Nomogram for Lymph Node Metastasis of Hepatocellular Carcinoma Based on Serum Long Noncoding RNAs                                                      | Biomed Res Int                | Y              | Excluded        | 1                     | lymph node metastasis vs non-lymph node metastasis HCC       |
| P_073 | Niu JZ             | 2020 | Long non-coding RNA linc00261 as a novel potential diagnostic and prognostic biomarker for gallbladder cancer                                                                   | Translational Cancer Research | Y              | Excluded        | 11                    | Gall bladder CA                                              |
| P_075 | Rojas A            | 2020 | lncRNA-H19 as a marker of liver progression from steatosis to hepatocellular carcinoma                                                                                          | Journal of Hepatology         | Y              | Excluded        | 6                     | Poster                                                       |
| P_079 | Wang D             | 2020 | Exosomal lncRNA H19 promotes the progression of hepatocellular carcinoma treated with Propofol via miR-520a-3p/LIMK1 axis                                                       | Cancer Med                    | Y              | Excluded        | 1                     | Cell line                                                    |
| P_080 | Wang SC            | 2020 | Circulating exosome DANCER correlated to the recurrence of hepatitis C virus-related hepatocellular carcinoma                                                                   | Journal of Clinical Oncology  | Y              | Excluded        | 6                     | Meeting abstract                                             |
| P_081 | Xia Q              | 2020 | Identification and Analysis of the Blood lncRNA Signature for Liver Cirrhosis and Hepatocellular Carcinoma                                                                      | Frontiers in Genetics         | Y              | Excluded        | 1                     | Data from gene expression omnibus, machine learning analysis |
| P_083 | Fang Z             | 2021 | Genome-wide long noncoding RNA and mRNA expression profiles demonstrate associations between exposure to inorganic elements and the risk of developing hepatocellular carcinoma | BMC Med Genomics              | Y              | Excluded        | 1                     | No validation of study                                       |
| P_085 | Guo Y              | 2021 | Epigenetically-regulated serum GAS5 as a potential biomarker for patients with chronic hepatitis B virus infection                                                              | Cancer Biomark                | Y              | Excluded        | 1                     | Not HCC                                                      |
| P_087 | Lee YR             | 2021 | Circulating exosomal lncrna-atb promotes myopenia in human hepatocellular carcinoma                                                                                             | Hepatology                    | Y              | Excluded        | 2                     | No comparison, Prognosis                                     |



| ID    | Author       | Year | Title                                                                                                                                                                 | Journal                     | Retrieve (Y/N) | Include/Exclude | Reasons for exclusion |                                             |
|-------|--------------|------|-----------------------------------------------------------------------------------------------------------------------------------------------------------------------|-----------------------------|----------------|-----------------|-----------------------|---------------------------------------------|
| P_088 | Manganelli M | 2021 | 10P Emerging role of Telomeric repeat-containing RNA TERRA in hepatocellular carcinoma                                                                                | Annals of Oncology          | Y              | Excluded        | 6                     | Poster                                      |
| P_092 | Zhang L      | 2021 | Serum lnc34a is a potential prediction biomarker for bone metastasis in hepatocellular carcinoma patients                                                             | BMC Cancer                  | Y              | Excluded        | 1                     | HCC with bone metastasis compare to non met |
| P_094 | Zhu Y        | 2021 | Integrative analysis of long extracellular RNAs reveals a detection panel of noncoding RNAs for liver cancer                                                          | Theranostics                | Y              | Excluded        | 7                     | Too few patients information                |
| P_102 | Han C        | 2022 | The expression of long non-coding RNA HOTAIR in advanced hepatocellular carcinoma and its prognostic correlation with sunitinib therapy                               | Archives of Medical Science | Y              | Excluded        | 1                     | PBMC                                        |
| P_105 | Kunadirak M  | 2022 | Transcriptomic Analyses Reveal Long Non-Coding RNA in Peripheral Blood Mononuclear Cells as a Novel Biomarker for Diagnosis and Prognosis of Hepatocellular Carcinoma | Int J Mol Sci               | Y              | Excluded        | 1                     | PBMC                                        |
| P_104 | Huang XL     | 2022 | Serum exosomal long noncoding RNA CRNDE level for hepatocellular carcinoma diagnosis                                                                                  | J Clin Lab Anal             | Y              | Excluded        | 11                    | Letter to editor                            |
| P_106 | Li L         | 2022 | Serum Exosomal lncRNA AC007099.1 Regulates the Expression of Neuropeptide-Related FAP, as a Potential Biomarker for Hepatocarcinogenesis                              | Dis Markers                 | Y              | Excluded        | 10                    | Not primary data                            |

**Table S6 Characteristics of all eligible studies**

| study            | Author         | country | lncrna                                                               | types of sample | measurement method                                                | n_case                           | case definition                                     | n_control                 | control definition                                                                              | References |
|------------------|----------------|---------|----------------------------------------------------------------------|-----------------|-------------------------------------------------------------------|----------------------------------|-----------------------------------------------------|---------------------------|-------------------------------------------------------------------------------------------------|------------|
| P_003            | Xie, 2014      | China   | HULC                                                                 | Plasma          | qRT-PCR                                                           | 30                               | HCC                                                 | 20                        | Healthy with no HCC and HBV                                                                     | [1]        |
| P_004            | Li, 2015       | China   | HULC, linc00152, UCA1, TUG1, CCAT1, MEG3, MALAT1, GAS5               | Plasma          | qRT-PCR                                                           | 24                               | HCC                                                 | 24                        | Healthy control                                                                                 | [2]        |
| P_004_validation | Li, 2015       | China   | HULC; linc00152                                                      | Plasma          | qRT-PCR                                                           | 66                               | HCC                                                 | 53                        | Healthy control                                                                                 | [2]        |
| P_005            | Lu, 2015       | China   | lncRNAuc003wbd; lncRNA-AF085935                                      | Serum           | qRT-PCR                                                           | 137                              | HCC                                                 | 104 HBV; 138 HC           | Hepatitis B infection; Healthy control who had negative HCC and HBV                             | [3]        |
| P_007            | Tang, 2015     | China   | RP11-160H22.5; XLOC_014172; LOC149086                                | Plasma          | Microarray for screening; qRT-PCR in validation                   | Screen: 20; Validate: 147        | HCC                                                 | Screen: 20; Validate: 180 | Cancer free control                                                                             | [4]        |
| P_008            | Wang, 2015     | China   | uc001ncr; AX800134                                                   | Serum           | Microarray for screening (tumors); qRT-PCR in validation in blood | 50                               | HBV-positive HCC in validation                      | 50 HBV; 50 HC             | Hepatitis B infection; Healthy control Both in validation                                       | [5]        |
| P_010            | El-Tawdi, 2015 | Egypt   | UCA1                                                                 | Serum           | qRT-PCR                                                           | 70                               | HCC                                                 | 32 HCV; 38 HC             | Hepatitis C infection; Healthy control                                                          | [6]        |
| P_011            | El-Tawdi, 2016 | Egypt   | lncRNA-C terminal binding protein, androgen responsive (lncRNA-CTBP) | Serum           | qRT-PCR                                                           | 78                               | HCC                                                 | 36 CHC; 44 HC             | Chronic hepatitis cirrhosis; Healthy control                                                    | [7]        |
| P_013            | Huang, 2016    | China   | DGCR5                                                                | Serum           | qRT-PCR                                                           | 60                               | HCC                                                 | 60                        | Healthy Control                                                                                 | [8]        |
| P_014            | Jing, 2016     | China   | SPRY4                                                                | Plasma          | qRT-PCR                                                           | HCC pre-op, 60; HCC post-op, 60; | HCC at pre-operation; HCC at 2 week post-operation; | 85 HBV; 63 HC             | HBV & cirrhosis; Controls without hepatitis, hepatic disease and no abnormal liver biochemistry | [9]        |
| P_015            | Kamel, 2016    | Egypt   | lncRNA-UCA1; lncRNA-WRAP53                                           | Serum           | qRT-PCR                                                           | 82                               | HCC                                                 | 34 HCV; 44 HC             | Chronic HCV infection; Healthy controls with no HCV, HBV infections or HCC                      | [10]       |

| study | Author             | country | lncrna                                         | types of sample          | measurement method | n_case                                               | case definition                                           | n_control                  | control definition                                                                                           | References |
|-------|--------------------|---------|------------------------------------------------|--------------------------|--------------------|------------------------------------------------------|-----------------------------------------------------------|----------------------------|--------------------------------------------------------------------------------------------------------------|------------|
| P_016 | Ma, 2016           | China   | DANCR                                          | Plasma                   | qRT-PCR            | 52                                                   | HCC                                                       | 29 HBV;<br>22 LC;<br>43 HC | Hepatitis B infection;<br>Liver cirrhosis;<br>Healthy Control                                                | [11]       |
| P_017 | Yu, 2016           | China   | PVT1;<br>uc002mbe.2                            | Serum                    | qRT-PCR            | 40                                                   | HCC                                                       | 33                         | Healthy Control                                                                                              | [12]       |
| P_019 | Cao, 2017          | China   | UBE2CP3                                        | Serum                    | qRT-PCR            | pre-op, 40<br>post-op, 40                            | HCC at pre-operative and post-operative                   | 75                         | Healthy volunteer                                                                                            | [13]       |
| P_020 | Chen, 2017         | China   | UCA1                                           | Plasma                   | qRT-PCR            | 20 HCC with metastasis;<br>20 HCC without metastasis | HCC with intra-hepatic metastasis; HCC without metastasis | 20                         | Healthy control                                                                                              | [14]       |
| P_023 | Ma, 2017           | China   | JPX;<br>XIST have no data and not significant  | Plasma                   | qRT-PCR            | 42                                                   | HCC                                                       | 68                         | Healthy controls without malignancies or HBV infection                                                       | [15]       |
| P_024 | Qin, 2017          | China   | BANCR                                          |                          | qRT-PCR            | 110                                                  | HCC                                                       | 90 BLD;<br>120 HC          | Benign liverdisease contaning chronic hepatitis, fatty liver and alcoholic liver disease;<br>Healthy control | [16]       |
| P_026 | Yuan, 2017         | China   | LINC00152, RP11-160H22.5, XLOC014172;LOC149086 | Plasma                   | qRT-PCR            | 100                                                  | HCC                                                       | 100 CH;<br>100 HC          | Chronic hepatitis;<br>Healthy control                                                                        | [17]       |
| P_027 | Abd El Gwad,2018   | Egypt   | LncRNA RP11-513115.6                           | Serum                    | qRT-PCR            | 60                                                   | HCC                                                       | 42 HCV;<br>18 HC           | Hepatitis C infection;<br>Healthy control                                                                    | [18]       |
| P_029 | Gao, 2018          | China   | SHNG1                                          | Plasma                   | qRT-PCR            | 72                                                   | HCC                                                       | 50 HBV;<br>50 HC           | HBV-positive chronic hepatitis and cirrhosis;<br>Healthy control                                             | [19]       |
| P_030 | Gong, 2018         | China   | nc-HOXC8-143                                   | Plasma                   | qRT-PCR            | 200                                                  | HCC                                                       | 200                        | Cancer free control                                                                                          | [20]       |
| P_031 | Gramantieri , 2018 | Italy   | CASC9                                          | serum from fasting blood | qRT-PCR            | 14                                                   | Cirrhosis with HCC                                        | 10                         | Cirrhosis without HCC                                                                                        | [21]       |
| P_033 | Huang, 2018        | China   | linc-ITGB1                                     | Serum                    | qRT-PCR            | 80                                                   | HCC                                                       | 44                         | Healthy control                                                                                              | [22]       |
| P_034 | Li, 2018           | China   | FAL1                                           | Serum (Exo)              | qRT-PCR            | 30                                                   | HCC                                                       | 30                         | Healthy control                                                                                              | [23]       |
| P_035 | Lou, 2018          | China   | ZFAS1                                          | Plasma                   | qRT-PCR            | 80                                                   | HCC                                                       | 75 HBV;<br>99 HC           | Chronic hepatitis B;<br>Healthy control                                                                      | [24]       |

| study     | Author       | country | lncrna                                       | types of sample | measurement method | n_case                           | case definition                                    | n_control                                | control definition                                                                                                        | References |
|-----------|--------------|---------|----------------------------------------------|-----------------|--------------------|----------------------------------|----------------------------------------------------|------------------------------------------|---------------------------------------------------------------------------------------------------------------------------|------------|
| P_036     | Sun, 2018    | China   | LINC00161                                    | Serum           | qRT-PCR            | 20                               | HCC                                                | 20                                       | Healthy control                                                                                                           | [25]       |
| P_036_Val | Sun, 2018    | China   | LINC00162                                    | Serum           | qRT-PCR            | 56                               | HCC                                                | 56                                       | Healthy control                                                                                                           | [25]       |
| P_038     | Wang, 2018   | China   | GAS5-AS1                                     | Plasma          | qRT-PCR            | 63                               | HCC                                                | 46 HBV;<br>47 LC;<br>58 HC               | Chronic hepatitis B;<br>Liver cirrhosis;<br>Healthy control                                                               | [26]       |
| P_039     | Wang, 2018   | China   | LRB1                                         | Serum           | qRT-PCR            | 326                              | HCC                                                | 73                                       | Healthy control                                                                                                           | [27]       |
| P_040     | Xie, 2018    | China   | lnc-PCDH9-13:1                               | plasma+saliva   | qRT-PCR            | 10+10                            | HCC<br>plasma+saliva samples                       | 10+10                                    | Healthy control<br>plasma+saliva samples                                                                                  | [28]       |
| P_040_Val | Xie, 2018    | China   | lnc-PCDH9-13:2                               | saliva          | qRT-PCR            | 50 early HCC;<br>50 advanced HCC | Early HCC (stage 1-2);<br>Advanced HCC (stage 3-4) | 50 LC;<br>50 CHB;<br>50 HBsAG+;<br>50 HC | Liver cirrhosis;<br>Chronic hepatitis B;<br>HBsAG carriers;<br>Healthy control                                            | [28]       |
| P_041     | Xu, 2018     | China   | Exosome:<br>ENSG00000258332.1 ;<br>LINC00635 | serum           | qRT-PCR            | 60                               | HCC                                                | 96 HBV;<br>85 LC;<br>60 HC               | Hepatitis B infection;<br>Liver cirrhosis;<br>Healthy control                                                             | [29]       |
| P_043     | Zeng, 2018   | China   | DQ786243                                     | serum           | qRT-PCR            | 50                               | HCC                                                | 30                                       | Healthy control                                                                                                           | [30]       |
| P_045     | Zhang, 2018  | China   | RP11-46611.1                                 | serum           | qRT-PCR            | 72                               | HBV-related HCC                                    | 11                                       | Hemangioma patients                                                                                                       | [31]       |
| P_046     | Zheng, 2018  | China   | UCA1                                         | serum           | qRT-PCR            | 105                              | HCC                                                | 105 BLD;<br>105 HC                       | Benign liver disease;<br>Healthy control and                                                                              | [32]       |
| P_048     | Cao, 2019    | China   | Exosome HULC                                 | serum (Exo)     | qRT-PCR            | 30                               | HCC                                                | NA                                       | Healthy control                                                                                                           | [33]       |
| P_049     | Chao, 2019   | China   | lncRNA-D16366                                | serum           | qRT-PCR            | 107                              | HCC                                                | 58 LD;<br>85 HC                          | Benign liver disease defined as alcoholic liver disease, HBV, fatty liver and alcoholic liver disease;<br>Healthy control | [34]       |
| P_051     | Dong, 2019   | China   | MEG3                                         | serum           | qRT-PCR            | 54                               | HCC                                                | 54                                       | Healthy control                                                                                                           | [35]       |
| P_052     | Habieb, 2019 | Egypt   | lncRNA-TSIX                                  | serum           | qRT-PCR            | 65                               | HCC                                                | 32                                       | Healthy control                                                                                                           | [36]       |
| P_055     | Motawi, 2019 | Egypt   | lncRNA-AF085935;<br>lncRNAuc003wbd           | serum           | qRT-PCR            | 70                               | HCC                                                | 70 HBV;<br>70 HC                         | Hepatitis B infection;<br>Healthy control                                                                                 | [37]       |
| P_056     | Qi, 2019     | China   | IGF2AS                                       | serum           | qRT-PCR            | 34                               | HCC with HBV cirrhosis                             | 70                                       | HBV cirrhosis                                                                                                             | [38]       |

| study | Author              | country | lncrna                                                             | types of sample | measurement method | n_case | case definition | n_control           | control definition                                                                | References |
|-------|---------------------|---------|--------------------------------------------------------------------|-----------------|--------------------|--------|-----------------|---------------------|-----------------------------------------------------------------------------------|------------|
| P_057 | Refai, 2019         | Egypt   | TUG1;<br>CASC2                                                     | Plasma          | qRT-PCR            | 30     | HCC with HCV    | 20 HCV;<br>20 HC    | Hepatitis C infection;<br>Healthy control                                         | [39]       |
| P_058 | Shaker, 2019        | Egypt   | NEAT                                                               | Serum           | qRT-PCR            | 36     | HCC             | 36                  | Healthy control                                                                   | [40]       |
| P_060 | Wu F, 2019          | China   | ZFAS1                                                              | serum           | qRT-PCR            | 84     | HCC             | 50 CH/BLD;<br>50 HC | chronic hepatitis and<br>cirrhosis as benign liver<br>disease;<br>Healthy control | [41]       |
| P_061 | Xu, 2019            | China   | LINC00978                                                          | serum           | qRT-PCR            | 58     | HCC             | 45 Benign;<br>49 HC | Benign liver disease;<br>Healthy control and                                      | [42]       |
| P_062 | Zeng, 2019          | China   | CASC9                                                              | Serum           | qRT-PCR            | 80     | HCC             | 50                  | healthy volunteer                                                                 | [43]       |
| P_063 | Zeng, 2019          | China   | X91348                                                             | Serum           | qRT-PCR            | 107    | HCC             | 82                  | Healthy control                                                                   | [44]       |
| P_064 | Fang, 2020          | China   | MAGI2-AS3                                                          | Plasma          | qRT-PCR            | 68     | HCC             | 68                  | Healthy control                                                                   | [45]       |
| P_065 | Huang J, 2020       | China   | HULC, MALAT1,<br>LINC00152, PTTG3P,<br>SPRY4-IT1, UBE2CP3,<br>UCA1 | Serum           | qRT-PCR            | 129    | HCC             | 93                  | Healthy control                                                                   | [46]       |
| P_66  | Huang X, 2020       | China   | RP11-544D21.1, RP11-<br>919I15.4, RP11-<br>85G21.1                 | Plasma(Exo)     | qRT-PCR            | 112    | HCC             | 52HC                | Healthy control                                                                   | [47]       |
| P_67  | Jiang L, 2020       | China   | HAND2-AS1                                                          | Serum           | qRT-PCR            | 44     | HCC             | 38 HB;<br>32 HC     | Hepatitis C infection;<br>Healthy control                                         | [48]       |
| P_68  | Kim SS, 2020        | Korea   | LINC00853                                                          | Serum(EV)       | qRT-PCR            | 100    | HCC             | 102 HC              | Healthy control                                                                   | [49]       |
| P_69  | Li Y, 2020          | China   | NONHSAT053785                                                      | Serum           | ddPCR              | 112    | HCC             | 99 HC               | Healthy control                                                                   | [50]       |
| P_70  | Lu Y, 2020          | China   | ENSG00000248932.1,<br>ENST00000440688.1,<br>ENST00000457302.2      | Plasma(Exo)     | qRT-PCR            | 200    | HCC             | 200 HC              | Healthy control                                                                   | [51]       |
| P_71  | Matboli M, 2020     | Egypt   | RP11-538F2.2                                                       | Serum           | qRT-PCR            | 60     | HCC             | 18 HC               | Healthy control                                                                   | [52]       |
| P_72  | Mohyelddeen M, 2020 | Egypt   | NEAT1, TUG1                                                        | Serum           | qRT-PCR            | 40     | HCC             | 40 HCV;<br>20 HC    | Hepatitis C infection;<br>Healthy control                                         | [53]       |
| P_74  | Qin SJ, 2020        | China   | ST8SIA6-AS1                                                        | Serum           | qRT-PCR            | 77     | HCC             | 55                  | Healthy control                                                                   | [54]       |
| P_76  | Rhosdy F, 2020      | Egypt   | HOTAIR, HOTTIP                                                     | Serum           | qRT-PCR            | 25     | HCC             | 50 CLD;<br>25 HC    | Chronic liver disease with<br>or without cirrhosis;<br>Healthy control;           | [55]       |

| study | Author               | country     | lncrna                                        | types of sample | measurement method | n_case                              | case definition                                                                                                                              | n_control                  | control definition                                                          | References |
|-------|----------------------|-------------|-----------------------------------------------|-----------------|--------------------|-------------------------------------|----------------------------------------------------------------------------------------------------------------------------------------------|----------------------------|-----------------------------------------------------------------------------|------------|
| P_77  | Shaker OG, 2020      | Egypt       | HOTAIR                                        | Serum           | qRT-PCR            | 50                                  | HCC                                                                                                                                          | 50 HCV;<br>45 HC           | Hepatitis C infection;<br>Healthy control                                   | [56]       |
| P_078 | Song W, 2020         | China       | PVT1                                          | Serum           | qRT-PCR            | 94                                  | HCC with HBV cirrhosis                                                                                                                       | 52                         | HBV cirrhosis                                                               | [57]       |
| P_82  | Yao Z., 2020         | China       | GPR89B-15, FAM72D-, FAM21A-2, EPC1-4, ZEB2-19 | Serum(Exo)      | qRT-PCR            | 45                                  | HCC                                                                                                                                          | 45 LD;<br>45 LC;<br>45 HC; | Liver disease;<br>Liver cirrhosis;<br>Healthy control                       | [58]       |
| P_86  | Kim S., 2021         | South Korea | DELOU2, HOTTIP, MALAT1, SNHG1                 | Serum(EV)       | qRT-PCR            | 100                                 | HCC                                                                                                                                          | 36                         | Healthy control                                                             | [59]       |
| P_89  | Tian Q., 2021        | China       | BACE1-AS                                      | Serum           | qRT-PCR            | 28                                  | HCC                                                                                                                                          | 28                         | Healthy control                                                             | [60]       |
| P_90  | Wang T., 2021        | China       | CRNDE                                         | Serum(Exo)      | qRT-PCR            | 166                                 | HCC                                                                                                                                          | 100                        | Healthy control                                                             | [61]       |
| P_91  | You L., 2021         | China       | LINC00161                                     | Serum(Exo)      | qRT-PCR            | 56                                  | HCC                                                                                                                                          | 56                         | Healthy control                                                             | [62]       |
| P_93  | Zhu X., 2021         | China       | LINC00485                                     | Serum           | qRT-PCR            | 70                                  | HCC                                                                                                                                          | 70 Hepatitis/LC ;<br>70 HC | Hepatitis or liver cirrhosis;<br>Healthy control                            | [63]       |
| P_95  | Ali M.A., 2022       | Egypt       | NBAT1, FOXCUT                                 | Serum           | qRT-PCR            | 165                                 | HCC on top HCV                                                                                                                               | 180 HCV;<br>180 HC         | Hepatitis C infection with no preceding therapy for HCV;<br>Healthy control | [64]       |
| P_96  | Bongolo C.C., 2022   | China       | LIPCAR                                        | Plasma          | qRT-PCR            | 70                                  | HCC                                                                                                                                          | 96 LC/CHB;<br>64 HC        | Liver cirrhosis and hepatitis B;<br>Healthy control                         | [65]       |
| P_97  | Chen J., 2022        | China       | LINC00941, LINC00514                          | Serum           | qRT-PCR            | 40                                  | HCC                                                                                                                                          | 40 LC;<br>37CHB;<br>30 HC  | Liver cirrhosis;<br>Chronic hepatitis B;<br>Healthy control male            | [66]       |
| P_98  | Chen Y., 2022        | China       | PCNAP1                                        | Plasma          | qRT-PCR            | 127                                 | HCC                                                                                                                                          | 127                        | Healthy control                                                             | [67]       |
| P_99  | El-Shendidi A., 2022 | Egypt       | HOTAIR                                        | Serum           | qRT-PCR            | 80 (40, stage C-D; 40, stage 0/A-B) | HCC on top HCV-LC, half of them were patients with tumor stages C-D according to the Barcelona Clinic Liver Cancer (BCLC) and the other half | 20                         | Healthy control with no evidence of LD                                      | [68]       |

| study     | Author              | country | lncrna                           | types of sample | measurement method | n_case | case definition         | n_control            | control definition                                         | References |
|-----------|---------------------|---------|----------------------------------|-----------------|--------------------|--------|-------------------------|----------------------|------------------------------------------------------------|------------|
|           |                     |         |                                  |                 |                    |        | with tumor stages 0/A-B |                      |                                                            |            |
| P_100     | Fu P., 2022         | China   | AC005332.5, ELF3-AS1, LINC00665  | Serum           | qRT-PCR            | 86     | HBV-related HCC         | 46                   | Healthy control                                            | [69]       |
| P_101     | Gong A., 2022       | China   | C10orf91, LINC01224              | Serum           | qRT-PCR            | 70     | HCC                     | 50                   | Healthy control                                            | [70]       |
| P_103     | Han Y., 2022        | China   | SCARNA10                         | Serum           | qRT-PCR            | 127    | HCC                     | 55 BLD; 99 HC        | Benign liver disease; Healthy control                      | [71]       |
| P_107     | Lou Z., 2022        | China   | HOTAIR, BRM, ICR                 | Serum           | qRT-PCR            | 61     | HCC                     | 20 LC; 20 HC         | Healthy control                                            | [72]       |
| P_108     | Manganelli M., 2022 | Italy   | TERRA1, TERRA3, TERC             | Plasma          | qRT-PCR            | 25     | HCC                     | 25                   | Healthy control                                            | [73]       |
| P_109     | Mo C., 2022         | China   | LINC01973                        | Whole blood     | qRT-PCR            | 52     | HCC-HBV positive        | 30 LC; 30 CHB; 30 HC | Liver cirrhosis; Chronic hepatitis B; Healthy control male | [74]       |
| P_110     | Mohammed S.R., 2022 | Egypt   | MEG3                             | Serum           | qRT-PCR            | 114    | HCC without treatment   | 110                  | Healthy control                                            | [75]       |
| P_111     | Yao J, 2022         | China   | H19-204, THEMIS2-211, PRKACA-202 | Plasma (Exo)    | qRT-PCR            | 33     | HCC                     | 15                   | Healthy control                                            | [76]       |
| P_111_Val | Yao J, 2022         | China   | H19-204, THEMIS2-211, PRKACA-203 | Plasma (Exo)    | qRT-PCR            | 59     | HCC                     | 41                   | Healthy control                                            | [76]       |

**Table S7 lncRNAs that have been studied in HCC, excluding PBMC**

| No . | lncRNAs         | Publications | Author, Year [References]                                                                        |
|------|-----------------|--------------|--------------------------------------------------------------------------------------------------|
| 1    | UCA1            | 5            | Li J., 2015; Kamel M.M., 2016; Chen C., 2017; Zheng Z., 2018; Huang J., 2020 [2, 10, 14, 32, 46] |
| 2    | HOTAIR          | 4            | Rhosdy F., 2020; Shaker O.G., 2020; El-Shendidi A., 2022; Lou Z., 2022 [55, 56, 68, 72]          |
| 3    | HULC            | 4            | Xie H., 2014; Li J., 2015; Li J., 2015 (validation) Huang J., 2020 [1, 2, 46]                    |
| 4    | MALAT1          | 3            | Li J., 2015; Huang J., 2020; Kim S., 2021 [2, 46, 59]                                            |
| 5    | MEG3            | 3            | Li J., 2015; Dong H., 2019; Mohammed S.R., 2022 [2, 35, 75]                                      |
| 6    | TUG1            | 3            | Li J., 2015; Refai N.S., 2019; Mohyeldeen M., 2020 [2, 39, 53]                                   |
| 7    | AF085935        | 2            | Lu J., 2015; Motawi T., 2019 [2, 37]                                                             |
| 8    | CASC9           | 2            | Gramantieri L., 2018; Zeng Y., 2019 [21, 43]                                                     |
| 9    | GAS5            | 2            | Li J., 2015; Wang Y., 2018 [2, 26]                                                               |
| 10   | HOTTIP          | 2            | Rhosdy F., 2020; Kim S., 2021 [55, 59]                                                           |
| 11   | Linc00152       | 2            | Li J., 2015; Huang J., 2020 [2, 46]                                                              |
| 12   | Linc00161       | 2            | Sun L., 2018; You L., 2021 [25, 62]                                                              |
| 13   | lncRNA-AF085935 | 2            | Lu J., 2015; Motawi T., 2019 [3, 37]                                                             |
| 14   | LOC149086       | 2            | Tang J., 2015; Yuan Y., 2017 [4, 17]                                                             |
| 15   | NEAT            | 2            | Shaker O.G., 2019; Mohyeldeen M., 2020 [40, 53]                                                  |
| 16   | RP11-160H22.5   | 2            | Tang J., 2015; Yuan W., 2017 [4, 17]                                                             |
| 17   | SPRY4           | 2            | Jing W., 2016; Huang J., 2020 [9, 46]                                                            |
| 18   | UBE2CP3         | 2            | Cao S., 2017; Huang J., 2020 [13, 46]                                                            |
| 19   | uc003wbd        | 2            | Lu J., 2015; Motawi T., 2019 [3, 37]                                                             |
| 20   | XLOC014172      | 2            | Tang J., 2015; Yuan Y., 2017 [4, 17]                                                             |
| 21   | ZFAS1           | 2            | Lou P., 2018; Wu F., 2019 [24, 41]                                                               |
| 22   | AC005332.5      | 1            | Fu P., 2022 [69]                                                                                 |
| 23   | BACE1-AS        | 1            | Tian Q., 2021 [60]                                                                               |
| 24   | BANCR           | 1            | Qin Y., 2017 [16]                                                                                |
| 25   | BRM             | 1            | Lou Z., 2022 [72]                                                                                |
| 26   | C10orf91        | 1            | Gong A., 2022 [70]                                                                               |
| 27   | CCAT            | 1            | Li J., 2015 [2]                                                                                  |
| 28   | CRNDE           | 1            | Wang T., 2021 [61]                                                                               |
| 29   | CTBP            | 1            | El-Tawdi A.H.F., 2016 [7]                                                                        |
| 30   | DANCR           | 1            | Ma X., 2016 [11]                                                                                 |
| 31   | DELOU2          | 1            | Kim S., 2021 [59]                                                                                |



|    |                   |   |                         |
|----|-------------------|---|-------------------------|
| 32 | DGCR5             | 1 | Huang R., 2016 [8]      |
| 33 | DQ786243          | 1 | Zeng B., 2018 [30]      |
| 34 | ELF3-AS1          | 1 | Fu P., 2022 [69]        |
| 35 | ENSG00000248932.1 | 1 | Lu Y., 2020 [51]        |
| 36 | ENSG00000258332.1 | 1 | Xu H., 2018 [29]        |
| 37 | ENST00000440688.1 | 1 | Lu Y., 2020 [51]        |
| 38 | ENST00000457302.2 | 1 | Lu Y., 2020 [51]        |
| 39 | EPC1-4            | 1 | Yao Z., 2020 [58]       |
| 40 | FAL1              | 1 | Li B., 2018 [23]        |
| 41 | FAM21A-2          | 1 | Yao Z., 2020 [58]       |
| 42 | FAM72D            | 1 | Yao Z., 2020 [58]       |
| 43 | FOXCUT            | 1 | Ali M.A., 2022 [64]     |
| 44 | GPR89B-15         | 1 | Yao Z., 2020 [58]       |
| 45 | H19-204           | 1 | Yao J., 2022 [58]       |
| 46 | HAND2-AS1         | 1 | Jiang L., 2020 [48]     |
| 47 | ICR               | 1 | Lou Z., 2022 [72]       |
| 48 | IGF2AS            | 1 | Qi J., 2019 [38]        |
| 49 | ITGB1             | 1 | Huang L., 2018 [22]     |
| 50 | JPX               | 1 | Ma W., 2017 [15]        |
| 51 | LINC00152         | 1 | Li J., 2015 [2]         |
| 52 | LINC00485         | 1 | Zhu X., 2021 [63]       |
| 53 | LINC00514         | 1 | Chen J., 2022 [66]      |
| 54 | LINC00635         | 1 | Xu H., 2018 [29]        |
| 55 | LINC00665         | 1 | Fu P., 2022 [69]        |
| 56 | LINC00853         | 1 | Kim S.S., 2020 [49]     |
| 57 | LINC00941         | 1 | Chen J., 2022 [66]      |
| 58 | LINC00978         | 1 | Xu X., 2019 [42]        |
| 59 | LINC01224         | 1 | Gong A., 2022 [70]      |
| 60 | LINC01973         | 1 | Mo C., 2022 [74]        |
| 61 | LIPCAR            | 1 | Bongolo C.C., 2022 [65] |
| 62 | lncRNA-D16366     | 1 | Chao Y., 2019 [34]      |
| 63 | lncRNA-TSIX       | 1 | Habieb A., 2019 [36]    |
| 64 | LRB1              | 1 | Wang Z.F., 2018 [27]    |
| 65 | MAGI2-AS3         | 1 | Fang G., 2020 [45]      |
| 66 | NBAT1             | 1 | Ali M.A., 2022 [64]     |
| 67 | nc-HOXC8-143      | 1 | Gong L., 2018 [20]      |

|    |               |   |                          |
|----|---------------|---|--------------------------|
| 68 | NONHSAT053785 | 1 | Li Y., 2020 [50]         |
| 69 | PCDH9-13:1    | 1 | Xie Z., 2018 [28]        |
| 70 | PCNAP1        | 1 | Chen Y., 2022 [67]       |
| 71 | PRKACA-202    | 1 | Yao J., 2022 [76]        |
| 72 | PTTG3P        | 1 | Huang J., 2020 [46]      |
| 73 | PVT1          | 1 | Yu J., 2016 [12]         |
| 74 | RP11-466l1.1  | 1 | Zhang J., 2018 [31]      |
| 75 | RP11-513l15.6 | 1 | Abd El Gwad,2018 [18]    |
| 76 | RP11-538F2.2  | 1 | Matboli M., 2020 [52]    |
| 77 | RP11-544D21.1 | 1 | Huang X., 2020 [46]      |
| 78 | RP11-85G21.1  | 1 | Huang X., 2020 [46]      |
| 79 | RP11-919l15.4 | 1 | Huang X., 2020 [46]      |
| 80 | SCARNA10      | 1 | Han Y., 2022 [71]        |
| 81 | SHNG1         | 1 | Gao S., 2018 [19]        |
| 82 | TERC          | 1 | Manganelli M., 2022 [73] |
| 83 | TERRA1        | 1 | Manganelli M., 2022 [73] |
| 84 | TERRA3        | 1 | Manganelli M., 2022 [73] |
| 85 | THEMIS2-211   | 1 | Yao J., 2022 [76]        |
| 86 | uc001ncr      | 1 | Wang K., 2015 [5]        |
| 87 | X91348        | 1 | Zeng Z., 2019 [44]       |
| 88 | ZEB2-19       | 1 | Yao Z., 2020 [58]        |

**Table S8.1 Risk of bias assessment of the candidate lncRNA studies**

| Study ID              | P_003                                                                                                                   | Author | Xie et al., 2014 | Assessor                                                                                                                                      |  |
|-----------------------|-------------------------------------------------------------------------------------------------------------------------|--------|------------------|-----------------------------------------------------------------------------------------------------------------------------------------------|--|
| Domain                | Signalling question                                                                                                     |        | Response         | Comments                                                                                                                                      |  |
| 1. Patient selection  | 1.1 Was a consecutive or random sample of patients enrolled?                                                            |        | Unclear          | No information of case recruitment, exclusion criteria, with unmatched control                                                                |  |
|                       | 1.2 Was a case-control design avoided?                                                                                  |        | -                |                                                                                                                                               |  |
|                       | 1.3 Did the study avoid inappropriate exclusions?                                                                       |        | Unclear          |                                                                                                                                               |  |
|                       | Risk of bias judgement                                                                                                  |        | Some concern     | There is some concern in case recruitment since no diagnostic data provided.                                                                  |  |
|                       | 1.4 Is there concern that the included patients do not match the review question?                                       |        | No               | HCC                                                                                                                                           |  |
|                       | Applicability judgement                                                                                                 |        | Low risk         | Match review question                                                                                                                         |  |
| 2. Index test(s)      | 2.1 Were the index test results interpreted without knowledge of the results of the reference standard?                 |        | Unclear          | NI                                                                                                                                            |  |
|                       | 2.2 If a threshold was used, was it pre-specified?                                                                      |        | No               | No threshold for positive result, only % of detection.                                                                                        |  |
|                       | Risk of bias judgement                                                                                                  |        | Some concern     | No crude expression level reported.                                                                                                           |  |
|                       | 2.3 Is there concern that the index test, its conduct, or interpretation differ from the review question?               |        | Yes              | No crude expression level reported.                                                                                                           |  |
|                       | Applicability judgement                                                                                                 |        | Some concern     | No crude expression level reported.                                                                                                           |  |
| 3. Reference standard | 3.1 Is the reference standard likely to correctly classify the target condition?                                        |        | Unclear          | NI                                                                                                                                            |  |
|                       | 3.2 Were the reference standard results interpreted without knowledge of the results of the index test?                 |        | Unclear          | NI                                                                                                                                            |  |
|                       | Risk of bias judgement                                                                                                  |        | Some concern     | No HCC diagnostic procedure specified.                                                                                                        |  |
|                       | 3.3 Is there concern that the target condition as defined by the reference standard does not match the review question? |        | No               | HCC                                                                                                                                           |  |
|                       | Applicability judgement                                                                                                 |        | Low              | Match review question, still contain some unclear HCC diagnosis.                                                                              |  |
| 4. Flow and timing    | 4.1 Was there an appropriate interval between index test(s) and reference standard?                                     |        | unclear          | No information regarding the treatment before index test.                                                                                     |  |
|                       | 4.2 Did all patients receive a reference standard?                                                                      |        | Yes              |                                                                                                                                               |  |
|                       | 4.3 Did patients receive the same reference standard?                                                                   |        | unclear          | No evidence of different reference standard                                                                                                   |  |
|                       | 4.4 Were all patients included in the analysis?                                                                         |        | Yes              | N analysed as recruited                                                                                                                       |  |
|                       | Risk of bias judgement                                                                                                  |        | Some concerns    | Contains many unclear information which are crucial. Still, all patients were analysed, and no evidence of treatment before sample collection |  |

**Table S8.2 Risk of bias assessment of the candidate lncRNA studies**

| Study ID                     | P_004                                                                                                                   | Author | Li et al., 2015      | Assessor                                                                                                                         |  |
|------------------------------|-------------------------------------------------------------------------------------------------------------------------|--------|----------------------|----------------------------------------------------------------------------------------------------------------------------------|--|
| Domain                       | Signalling question                                                                                                     |        | Response             | Comments                                                                                                                         |  |
| <b>1. Patient selection</b>  | 1.1 Was a consecutive or random sample of patients enrolled?                                                            |        | Unclear              | Case underwent hepatic resection; Controls were from healthy volunteers without any health problems. Unclear exclusion criteria. |  |
|                              | 1.2 Was a case-control design avoided?                                                                                  |        | -                    |                                                                                                                                  |  |
|                              | 1.3 Did the study avoid inappropriate exclusions?                                                                       |        | Unclear              |                                                                                                                                  |  |
|                              | <b>Risk of bias judgement</b>                                                                                           |        | <b>Low</b>           | <b>Even unmatched case-control, clear case selection</b>                                                                         |  |
|                              | 1.4 Is there concern that the included patients do not match the review question?                                       |        | <b>No</b>            | HCC                                                                                                                              |  |
|                              | <b>Applicability judgement</b>                                                                                          |        | <b>Low</b>           | <b>Match review question</b>                                                                                                     |  |
| <b>2. Index test(s)</b>      | 2.1 Were the index test results interpreted without knowledge of the results of the reference standard?                 |        | Unclear              | NI                                                                                                                               |  |
|                              | 2.2 If a threshold was used, was it pre-specified?                                                                      |        | No                   | No threshold                                                                                                                     |  |
|                              | <b>Risk of bias judgement</b>                                                                                           |        | <b>Low</b>           | <b>Explore the fold change, then validate the results in new population. Still, no blinding specified.</b>                       |  |
|                              | 2.3 Is there concern that the index test, its conduct, or interpretation differ from the review question?               |        | <b>No</b>            | lncRNA expression level                                                                                                          |  |
|                              | <b>Applicability judgement</b>                                                                                          |        | <b>Low</b>           | <b>Match review question</b>                                                                                                     |  |
| <b>3. Reference standard</b> | 3.1 Is the reference standard likely to correctly classify the target condition?                                        |        | Yes                  | 66 HCC patients underwent hepatic resections                                                                                     |  |
|                              | 3.2 Were the reference standard results interpreted without knowledge of the results of the index test?                 |        | Unclear              | No information                                                                                                                   |  |
|                              | <b>Risk of bias judgement</b>                                                                                           |        | <b>Low</b>           | <b>All patients were diagnosed by histological examination.</b>                                                                  |  |
|                              | 3.3 Is there concern that the target condition as defined by the reference standard does not match the review question? |        | No                   | HCC                                                                                                                              |  |
|                              | <b>Applicability judgement</b>                                                                                          |        | <b>Low</b>           | <b>Match review question</b>                                                                                                     |  |
| <b>4. Flow and timing</b>    | 4.1 Was there an appropriate interval between index test(s) and reference standard?                                     |        | unclear              | No information                                                                                                                   |  |
|                              | 4.2 Did all patients receive a reference standard?                                                                      |        | Yes                  |                                                                                                                                  |  |
|                              | 4.3 Did patients receive the same reference standard?                                                                   |        | Yes                  | All patients were diagnosed by histological examination.                                                                         |  |
|                              | 4.4 Were all patients included in the analysis?                                                                         |        | Yes                  | N analysed as recruited                                                                                                          |  |
|                              | <b>Risk of bias judgement</b>                                                                                           |        | <b>Some concerns</b> | <b>No evidence of treatment before index test.</b>                                                                               |  |

**Table S8.3 Risk of bias assessment of the candidate lncRNA studies**

| Study ID              | P_015                                                                                                                   | Author | Kamel et al, 2016 | Assessor                                                                                                                                                                                                                                                            |  |
|-----------------------|-------------------------------------------------------------------------------------------------------------------------|--------|-------------------|---------------------------------------------------------------------------------------------------------------------------------------------------------------------------------------------------------------------------------------------------------------------|--|
| Domain                | Signalling question                                                                                                     |        | Response          | Comments                                                                                                                                                                                                                                                            |  |
| 1. Patient selection  | 1.1 Was a consecutive or random sample of patients enrolled?                                                            |        | Unclear           | From January 2013 to February 2014, a total of 160 participants were enrolled into the study, assume consecutive. Healthy controls were excluded from the HCC, HCV diagnosis.                                                                                       |  |
|                       | 1.2 Was a case-control design avoided?                                                                                  |        | -                 |                                                                                                                                                                                                                                                                     |  |
|                       | 1.3 Did the study avoid inappropriate exclusions?                                                                       |        | Yes               |                                                                                                                                                                                                                                                                     |  |
|                       | Risk of bias judgement                                                                                                  |        | Low               | Appropriate cases definition, though unmatched controls                                                                                                                                                                                                             |  |
|                       | 1.4 Is there concern that the included patients do not match the review question?                                       |        | No                |                                                                                                                                                                                                                                                                     |  |
|                       | Applicability judgement                                                                                                 |        | Low               | Match the question                                                                                                                                                                                                                                                  |  |
| 2. Index test(s)      | 2.1 Were the index test results interpreted without knowledge of the results of the reference standard?                 |        | Unclear           | NI                                                                                                                                                                                                                                                                  |  |
|                       | 2.2 If a threshold was used, was it pre-specified?                                                                      |        | No                | No pre-specified threshold                                                                                                                                                                                                                                          |  |
|                       | Risk of bias judgement                                                                                                  |        | Some concerns     | Data driven threshold, not blind interpretation.                                                                                                                                                                                                                    |  |
|                       | 2.3 Is there concern that the index test, its conduct, or interpretation differ from the review question?               |        | No                | Use lncRNA                                                                                                                                                                                                                                                          |  |
|                       | Applicability judgement                                                                                                 |        | Low               | Match the question                                                                                                                                                                                                                                                  |  |
| 3. Reference standard | 3.1 Is the reference standard likely to correctly classify the target condition?                                        |        | Yes               | All patients were diagnosed according to American Association for the Study of Liver Diseases practice guidelines. HCC clinical stage was determined according to Barcelona Clinic Liver Cancer staging classification <sup>14</sup> and Child-Pugh classification. |  |
|                       | 3.2 Were the reference standard results interpreted without knowledge of the results of the index test?                 |        | Unclear           | NI                                                                                                                                                                                                                                                                  |  |
|                       | Risk of bias judgement                                                                                                  |        | Low               | Diagnostic criteria was specified                                                                                                                                                                                                                                   |  |
|                       | 3.3 Is there concern that the target condition as defined by the reference standard does not match the review question? |        | No                | HCC                                                                                                                                                                                                                                                                 |  |
|                       | Applicability judgement                                                                                                 |        | Low               | Match the question                                                                                                                                                                                                                                                  |  |
| 4. Flow and timing    | 4.1 Was there an appropriate interval between index test(s) and reference standard?                                     |        | unclear           | No information                                                                                                                                                                                                                                                      |  |
|                       | 4.2 Did all patients receive a reference standard?                                                                      |        | Yes               |                                                                                                                                                                                                                                                                     |  |
|                       | 4.3 Did patients receive the same reference standard?                                                                   |        | No                | Some had tissue biopsy                                                                                                                                                                                                                                              |  |
|                       | 4.4 Were all patients included in the analysis?                                                                         |        | Yes               | N=160 as recruited                                                                                                                                                                                                                                                  |  |
|                       | Risk of bias judgement                                                                                                  |        | Low               | NI for treatment, all included in analysis                                                                                                                                                                                                                          |  |

**Table S8.4 Risk of bias assessment of the candidate lncRNA studies**

| Study ID              | P_020                                                                                                                   | Author | Chen et al., 2017 | Assessor                                                                                                                                                                                                                        |  |
|-----------------------|-------------------------------------------------------------------------------------------------------------------------|--------|-------------------|---------------------------------------------------------------------------------------------------------------------------------------------------------------------------------------------------------------------------------|--|
| Domain                | Signalling question                                                                                                     |        | Response          | Comments                                                                                                                                                                                                                        |  |
| 1. Patient selection  | 1.1 Was a consecutive or random sample of patients enrolled?                                                            |        | Yes               | Plasma samples of 20 patients confirmed by combined diagnosis of imaging examination and surgical pathology results who were diagnosed from January 2015 to January 2016 were collected. Healthy control samples were collected |  |
|                       | 1.2 Was a case-control design avoided?                                                                                  |        | -                 |                                                                                                                                                                                                                                 |  |
|                       | 1.3 Did the study avoid inappropriate exclusions?                                                                       |        | Unclear           |                                                                                                                                                                                                                                 |  |
|                       | Risk of bias judgement                                                                                                  |        | Low               | Appropriate cases, unmatched control                                                                                                                                                                                            |  |
|                       | 1.4 Is there concern that the included patients do not match the review question?                                       |        | No                | HCC                                                                                                                                                                                                                             |  |
|                       | Applicability judgement                                                                                                 |        | Low               | Match the question                                                                                                                                                                                                              |  |
| 2. Index test(s)      | 2.1 Were the index test results interpreted without knowledge of the results of the reference standard?                 |        | Unclear           | NI                                                                                                                                                                                                                              |  |
|                       | 2.2 If a threshold was used, was it pre-specified?                                                                      |        | No                | No threshold                                                                                                                                                                                                                    |  |
|                       | Risk of bias judgement                                                                                                  |        | Low               | No evidence to blind result interpretation, and no threshold applied. Only the expression level reported.                                                                                                                       |  |
|                       | 2.3 Is there concern that the index test, its conduct, or interpretation differ from the review question?               |        | No                |                                                                                                                                                                                                                                 |  |
|                       | Applicability judgement                                                                                                 |        | Low               | lncRNA expression level match the question.                                                                                                                                                                                     |  |
| 3. Reference standard | 3.1 Is the reference standard likely to correctly classify the target condition?                                        |        | Yes               | All patients with liver cancer and intrahepatic metastasis were confirmed by combined diagnosis.                                                                                                                                |  |
|                       | 3.2 Were the reference standard results interpreted without knowledge of the results of the index test?                 |        | Unclear           | NI                                                                                                                                                                                                                              |  |
|                       | Risk of bias judgement                                                                                                  |        | Low               | Clearly defined reference test                                                                                                                                                                                                  |  |
|                       | 3.3 Is there concern that the target condition as defined by the reference standard does not match the review question? |        | No                | HCC                                                                                                                                                                                                                             |  |
|                       | Applicability judgement                                                                                                 |        | Low               | Match review question                                                                                                                                                                                                           |  |
| 4. Flow and timing    | 4.1 Was there an appropriate interval between index test(s) and reference standard?                                     |        | Yes               | All patients had not received radiotherapy and chemotherapy, immunotherapy, interventional therapy and liver transplantation., No intervention before the index test.                                                           |  |
|                       | 4.2 Did all patients receive a reference standard?                                                                      |        | Yes               |                                                                                                                                                                                                                                 |  |
|                       | 4.3 Did patients receive the same reference standard?                                                                   |        | Yes               |                                                                                                                                                                                                                                 |  |
|                       | 4.4 Were all patients included in the analysis?                                                                         |        | Yes               | N=60 as recruited.                                                                                                                                                                                                              |  |
|                       | Risk of bias judgement                                                                                                  |        | Low               | Same reference test, no treatment before index test and all included in analysis.                                                                                                                                               |  |

**Table S8.5 Risk of bias assessment of the candidate lncRNA studies**

| Study ID                     | P_046                                                                                                                   | Author | Zheng et al., 2018   | Assessor                                                                                                                                                                                                                          |  |
|------------------------------|-------------------------------------------------------------------------------------------------------------------------|--------|----------------------|-----------------------------------------------------------------------------------------------------------------------------------------------------------------------------------------------------------------------------------|--|
| Domain                       | Signalling question                                                                                                     |        | Response             | Comments                                                                                                                                                                                                                          |  |
| <b>1. Patient selection</b>  | 1.1 Was a consecutive or random sample of patients enrolled?                                                            |        | Unclear              | From June 2008 to July 2012, a total of 105 patients with histologically confirmed HCC were included in this study; 105 healthy volunteers (both age- and sex-matched). Patients with a history of previous cancer were excluded. |  |
|                              | 1.2 Was a case-control design avoided?                                                                                  |        | -                    |                                                                                                                                                                                                                                   |  |
|                              | 1.3 Did the study avoid inappropriate exclusions?                                                                       |        | Yes                  |                                                                                                                                                                                                                                   |  |
|                              | <b>Risk of bias judgement</b>                                                                                           |        | <b>Low</b>           | <b>Clear case definition, matched controls.</b>                                                                                                                                                                                   |  |
|                              | 1.4 Is there concern that the included patients do not match the review question?                                       |        | No                   | -                                                                                                                                                                                                                                 |  |
|                              | <b>Applicability judgement</b>                                                                                          |        | <b>Low</b>           | <b>Match review question</b>                                                                                                                                                                                                      |  |
| <b>2. Index test(s)</b>      | 2.1 Were the index test results interpreted without knowledge of the results of the reference standard?                 |        | Unclear              | NI                                                                                                                                                                                                                                |  |
|                              | 2.2 If a threshold was used, was it pre-specified?                                                                      |        | No                   | Not pre-specified.                                                                                                                                                                                                                |  |
|                              | <b>Risk of bias judgement</b>                                                                                           |        | <b>Some concerns</b> | <b>Assume no blinding result interpretation, and no threshold pre-specified.</b>                                                                                                                                                  |  |
|                              | 2.3 Is there concern that the index test, its conduct, or interpretation differ from the review question?               |        | No                   | lncRNA expression level, still generalizability is warranted.                                                                                                                                                                     |  |
|                              | <b>Applicability judgement</b>                                                                                          |        | <b>Low</b>           | <b>Match review question</b>                                                                                                                                                                                                      |  |
| <b>3. Reference standard</b> | 3.1 Is the reference standard likely to correctly classify the target condition?                                        |        | Yes                  | Histologically confirmed HCC                                                                                                                                                                                                      |  |
|                              | 3.2 Were the reference standard results interpreted without knowledge of the results of the index test?                 |        | Unclear              |                                                                                                                                                                                                                                   |  |
|                              | <b>Risk of bias judgement</b>                                                                                           |        | <b>Low</b>           | <b>Clear case definition</b>                                                                                                                                                                                                      |  |
|                              | 3.3 Is there concern that the target condition as defined by the reference standard does not match the review question? |        | No                   |                                                                                                                                                                                                                                   |  |
|                              | <b>Applicability judgement</b>                                                                                          |        | <b>Low</b>           | <b>Match review question</b>                                                                                                                                                                                                      |  |
| <b>4. Flow and timing</b>    | 4.1 Was there an appropriate interval between index test(s) and reference standard?                                     |        | Yes                  | Serum samples were drawn before surgery. No chemotherapy, radiotherapy, or targeted therapy was used prior to blood collection.                                                                                                   |  |
|                              | 4.2 Did all patients receive a reference standard?                                                                      |        | Yes                  | -                                                                                                                                                                                                                                 |  |
|                              | 4.3 Did patients receive the same reference standard?                                                                   |        | Yes                  | 105 patients with histologically confirmed                                                                                                                                                                                        |  |
|                              | 4.4 Were all patients included in the analysis?                                                                         |        | Yes                  | N analysed as recruited.                                                                                                                                                                                                          |  |
|                              | <b>Risk of bias judgement</b>                                                                                           |        | <b>Low</b>           | <b>Same reference test, all included in analyses and no prior treatment.</b>                                                                                                                                                      |  |

**Table S8.6 Risk of bias assessment of the candidate lncRNA studies**

| Study ID              | P_051                                                                                                                   | Author | Dong et al., 2019 | Assessor                                                                                                                                                                |  |
|-----------------------|-------------------------------------------------------------------------------------------------------------------------|--------|-------------------|-------------------------------------------------------------------------------------------------------------------------------------------------------------------------|--|
| Domain                | Signalling question                                                                                                     |        | Response          | Comments                                                                                                                                                                |  |
| 1. Patient selection  | 1.1 Was a consecutive or random sample of patients enrolled?                                                            |        | Unclear           | Patients with pathological and imaging confirmation were <b>selected</b> from the HCC cases. Controls from the hospitals with no significant difference of age and sex. |  |
|                       | 1.2 Was a case-control design avoided?                                                                                  |        | -                 |                                                                                                                                                                         |  |
|                       | 1.3 Did the study avoid inappropriate exclusions?                                                                       |        | Unclear           |                                                                                                                                                                         |  |
|                       | Risk of bias judgement                                                                                                  |        | Low               | Similar controls, though highly concern for patient selection.                                                                                                          |  |
|                       | 1.4 Is there concern that the included patients do not match the review question?                                       |        | No                | -                                                                                                                                                                       |  |
|                       | Applicability judgement                                                                                                 |        | Low               | Match review question                                                                                                                                                   |  |
| 2. Index test(s)      | 2.1 Were the index test results interpreted without knowledge of the results of the reference standard?                 |        | Unclear           | NI                                                                                                                                                                      |  |
|                       | 2.2 If a threshold was used, was it pre-specified?                                                                      |        | No                | No threshold applied                                                                                                                                                    |  |
|                       | Risk of bias judgement                                                                                                  |        | Some concerns     | Not pre-specified cut-off and no clear evidence of blinding when interpret the results.                                                                                 |  |
|                       | 2.3 Is there concern that the index test, its conduct, or interpretation differ from the review question?               |        | No                | -                                                                                                                                                                       |  |
|                       | Applicability judgement                                                                                                 |        | Low               | Match review question                                                                                                                                                   |  |
| 3. Reference standard | 3.1 Is the reference standard likely to correctly classify the target condition?                                        |        | Yes               | Pathological and imaging examinations were performed for all those patients                                                                                             |  |
|                       | 3.2 Were the reference standard results interpreted without knowledge of the results of the index test?                 |        | Unclear           | NI                                                                                                                                                                      |  |
|                       | Risk of bias judgement                                                                                                  |        | Low               | Clear diagnostic criteria                                                                                                                                               |  |
|                       | 3.3 Is there concern that the target condition as defined by the reference standard does not match the review question? |        | No                | -                                                                                                                                                                       |  |
|                       | Applicability judgement                                                                                                 |        | Low               | Match review question                                                                                                                                                   |  |
| 4. Flow and timing    | 4.1 Was there an appropriate interval between index test(s) and reference standard?                                     |        | Unclear           | NI of treatment prior to sample collection.                                                                                                                             |  |
|                       | 4.2 Did all patients receive a reference standard?                                                                      |        | Yes               | All                                                                                                                                                                     |  |
|                       | 4.3 Did patients receive the same reference standard?                                                                   |        | Yes               | All received Pathological and imaging examinations.                                                                                                                     |  |
|                       | 4.4 Were all patients included in the analysis?                                                                         |        | Yes               | N analysed as recruited.                                                                                                                                                |  |
|                       | Risk of bias judgement                                                                                                  |        | Low               | All received same reference test, and included to the analyses, though no information of prior treatment.                                                               |  |



**Table S8.7 Risk of bias assessment of the candidate lncRNA studies**

| Study ID              | P_057                                                                                                                   | Author | Refai et al., 2019 | Assessor                                                                                                                                                                               |  |
|-----------------------|-------------------------------------------------------------------------------------------------------------------------|--------|--------------------|----------------------------------------------------------------------------------------------------------------------------------------------------------------------------------------|--|
| Domain                | Signalling question                                                                                                     |        | Response           | Comments                                                                                                                                                                               |  |
| 1. Patient selection  | 1.1 Was a consecutive or random sample of patients enrolled?                                                            |        | Yes                | 30 newly diagnosed HCC (CHILD class A with no extrahepatic spread or lymph node involvement) on top of HCV patients according to AASLD Practice Guidelines. Unmatched healthy controls |  |
|                       | 1.2 Was a case-control design avoided?                                                                                  |        | -                  |                                                                                                                                                                                        |  |
|                       | 1.3 Did the study avoid inappropriate exclusions?                                                                       |        | Yes                |                                                                                                                                                                                        |  |
|                       | Risk of bias judgement                                                                                                  |        | Low                | Unmatched healthy controls, but with clear case definition.                                                                                                                            |  |
|                       | 1.4 Is there concern that the included patients do not match the review question?                                       |        | No                 | -                                                                                                                                                                                      |  |
|                       | Applicability judgement                                                                                                 |        | Low                | Match review question                                                                                                                                                                  |  |
| 2. Index test(s)      | 2.1 Were the index test results interpreted without knowledge of the results of the reference standard?                 |        | unclear            | NI                                                                                                                                                                                     |  |
|                       | 2.2 If a threshold was used, was it pre-specified?                                                                      |        | No                 | Not pre-specified.                                                                                                                                                                     |  |
|                       | Risk of bias judgement                                                                                                  |        | Some concerns      | Not pre-specified cut-off and no clear evidence of blinding when interpret the results.                                                                                                |  |
|                       | 2.3 Is there concern that the index test, its conduct, or interpretation differ from the review question?               |        | No                 | -                                                                                                                                                                                      |  |
|                       | Applicability judgement                                                                                                 |        | Low                | Match review question                                                                                                                                                                  |  |
| 3. Reference standard | 3.1 Is the reference standard likely to correctly classify the target condition?                                        |        | Yes                | According to AASLD Practice Guidelines                                                                                                                                                 |  |
|                       | 3.2 Were the reference standard results interpreted without knowledge of the results of the index test?                 |        | Unclear            | NI                                                                                                                                                                                     |  |
|                       | Risk of bias judgement                                                                                                  |        | Low                | Clear case definition.                                                                                                                                                                 |  |
|                       | 3.3 Is there concern that the target condition as defined by the reference standard does not match the review question? |        | No                 | -                                                                                                                                                                                      |  |
|                       | Applicability judgement                                                                                                 |        | Low                | Match review question                                                                                                                                                                  |  |
| 4. Flow and timing    | 4.1 Was there an appropriate interval between index test(s) and reference standard?                                     |        | Yes                | Newly diagnosed patients who had no previous radiotherapy or systemic chemotherapy or had undergone liver transplantation.                                                             |  |
|                       | 4.2 Did all patients receive a reference standard?                                                                      |        | Yes                |                                                                                                                                                                                        |  |
|                       | 4.3 Did patients receive the same reference standard?                                                                   |        | Yes                |                                                                                                                                                                                        |  |
|                       | 4.4 Were all patients included in the analysis?                                                                         |        | Yes                |                                                                                                                                                                                        |  |
|                       | Risk of bias judgement                                                                                                  |        | Low                | All patients received same reference test and included in the analysis.                                                                                                                |  |

**Table S8.8 Risk of bias assessment of the candidate lncRNA studies**

| Study ID              | P_065                                                                                                                   | Author | Huang et al., 2020 | Assessor                                                                                                                                                                                                                          |  |
|-----------------------|-------------------------------------------------------------------------------------------------------------------------|--------|--------------------|-----------------------------------------------------------------------------------------------------------------------------------------------------------------------------------------------------------------------------------|--|
| Domain                | Signalling question                                                                                                     |        | Response           | Comments                                                                                                                                                                                                                          |  |
| 1. Patient selection  | 1.1 Was a consecutive or random sample of patients enrolled?                                                            |        | Unclear            | The patients with HCC were histologically confirmed. As a healthy control, 93 individuals who performed their annual health check at the hospital and did not have any liver diseases or other cancerous diseases were recruited. |  |
|                       | 1.2 Was a case-control design avoided?                                                                                  |        | -                  |                                                                                                                                                                                                                                   |  |
|                       | 1.3 Did the study avoid inappropriate exclusions?                                                                       |        | Yes                |                                                                                                                                                                                                                                   |  |
|                       | Risk of bias judgement                                                                                                  |        | Low                | Unmatched control, but clear case definition.                                                                                                                                                                                     |  |
|                       | 1.4 Is there concern that the included patients do not match the review question?                                       |        | No                 | -                                                                                                                                                                                                                                 |  |
|                       | Applicability judgement                                                                                                 |        | Low                | Match review question                                                                                                                                                                                                             |  |
| 2. Index test(s)      | 2.1 Were the index test results interpreted without knowledge of the results of the reference standard?                 |        | Unclear            | NI                                                                                                                                                                                                                                |  |
|                       | 2.2 If a threshold was used, was it pre-specified?                                                                      |        | No                 | Not pre-specified, even not reported                                                                                                                                                                                              |  |
|                       | Risk of bias judgement                                                                                                  |        | Some concerns      | Not pre-specified threshold and no evidence of blinding in result interpretation.                                                                                                                                                 |  |
|                       | 2.3 Is there concern that the index test, its conduct, or interpretation differ from the review question?               |        | No                 | -                                                                                                                                                                                                                                 |  |
|                       | Applicability judgement                                                                                                 |        | Some concerns      | Match review question, but no cut-off point for applicability and generalizability.                                                                                                                                               |  |
| 3. Reference standard | 3.1 Is the reference standard likely to correctly classify the target condition?                                        |        | Yes                | HCC were histologically confirmed.                                                                                                                                                                                                |  |
|                       | 3.2 Were the reference standard results interpreted without knowledge of the results of the index test?                 |        | Unclear            | NI                                                                                                                                                                                                                                |  |
|                       | Risk of bias judgement                                                                                                  |        | Low                | Clear case definition.                                                                                                                                                                                                            |  |
|                       | 3.3 Is there concern that the target condition as defined by the reference standard does not match the review question? |        | No                 | -                                                                                                                                                                                                                                 |  |
|                       | Applicability judgement                                                                                                 |        | Low                | Match review question                                                                                                                                                                                                             |  |
| 4. Flow and timing    | 4.1 Was there an appropriate interval between index test(s) and reference standard?                                     |        | Unclear            | NI                                                                                                                                                                                                                                |  |
|                       | 4.2 Did all patients receive a reference standard?                                                                      |        | Yes                |                                                                                                                                                                                                                                   |  |
|                       | 4.3 Did patients receive the same reference standard?                                                                   |        | Yes                |                                                                                                                                                                                                                                   |  |
|                       | 4.4 Were all patients included in the analysis?                                                                         |        | Yes                |                                                                                                                                                                                                                                   |  |
|                       | Risk of bias judgement                                                                                                  |        | Low                | All patients received same reference test, and all included in the analysis.                                                                                                                                                      |  |

**Table S8.9 Risk of bias assessment of the candidate lncRNA studies**

| Study ID                     | P_072                                                                                                                   | Author | Mohyeldeen et al., 2020 | Assessor                                                                                                                                                                                                                                                                                                                                                                                                                                                                            |  |
|------------------------------|-------------------------------------------------------------------------------------------------------------------------|--------|-------------------------|-------------------------------------------------------------------------------------------------------------------------------------------------------------------------------------------------------------------------------------------------------------------------------------------------------------------------------------------------------------------------------------------------------------------------------------------------------------------------------------|--|
| Domain                       | Signalling question                                                                                                     |        | Response                | Comments                                                                                                                                                                                                                                                                                                                                                                                                                                                                            |  |
| <b>1. Patient selection</b>  | 1.1 Was a consecutive or random sample of patients enrolled?                                                            |        | Unclear                 | HCC was diagnosed by the presence of liver focal lesions which were detected by ultrasound and further confirmed by CT or MRI according to the protocol of European Association of the Study of the Liver and were staged according to Barcelona Clinic Liver Cancer staging system. The age and sex of control volunteers were statistically checked to be matching those of the patient population. Exclusion criteria included a history HBV, HIV, previous therapy of HCC, HCV. |  |
|                              | 1.2 Was a case-control design avoided?                                                                                  |        | -                       |                                                                                                                                                                                                                                                                                                                                                                                                                                                                                     |  |
|                              | 1.3 Did the study avoid inappropriate exclusions?                                                                       |        | Yes                     |                                                                                                                                                                                                                                                                                                                                                                                                                                                                                     |  |
|                              | <b>Risk of bias judgement</b>                                                                                           |        | <b>Low</b>              | <b>Similar controls, clear case definition.</b>                                                                                                                                                                                                                                                                                                                                                                                                                                     |  |
|                              | 1.4 Is there concern that the included patients do not match the review question?                                       |        | No                      | -                                                                                                                                                                                                                                                                                                                                                                                                                                                                                   |  |
|                              | <b>Applicability judgement</b>                                                                                          |        | <b>Low</b>              | <b>Match review question</b>                                                                                                                                                                                                                                                                                                                                                                                                                                                        |  |
| <b>2. Index test(s)</b>      | 2.1 Were the index test results interpreted without knowledge of the results of the reference standard?                 |        | Unclear                 | NI                                                                                                                                                                                                                                                                                                                                                                                                                                                                                  |  |
|                              | 2.2 If a threshold was used, was it pre-specified?                                                                      |        | No                      | Not pre-specified                                                                                                                                                                                                                                                                                                                                                                                                                                                                   |  |
|                              | <b>Risk of bias judgement</b>                                                                                           |        | <b>Some concerns</b>    | <b>Not pre-specified threshold and no evidence of blinding in result interpretation.</b>                                                                                                                                                                                                                                                                                                                                                                                            |  |
|                              | 2.3 Is there concern that the index test, its conduct, or interpretation differ from the review question?               |        | No                      | -                                                                                                                                                                                                                                                                                                                                                                                                                                                                                   |  |
|                              | <b>Applicability judgement</b>                                                                                          |        | <b>Low</b>              | <b>Match review question</b>                                                                                                                                                                                                                                                                                                                                                                                                                                                        |  |
| <b>3. Reference standard</b> | 3.1 Is the reference standard likely to correctly classify the target condition?                                        |        | Yes                     | clear case definition.                                                                                                                                                                                                                                                                                                                                                                                                                                                              |  |
|                              | 3.2 Were the reference standard results interpreted without knowledge of the results of the index test?                 |        | Unclear                 | NI                                                                                                                                                                                                                                                                                                                                                                                                                                                                                  |  |
|                              | <b>Risk of bias judgement</b>                                                                                           |        | <b>Low</b>              | <b>clear case definition.</b>                                                                                                                                                                                                                                                                                                                                                                                                                                                       |  |
|                              | 3.3 Is there concern that the target condition as defined by the reference standard does not match the review question? |        | No                      | -                                                                                                                                                                                                                                                                                                                                                                                                                                                                                   |  |
|                              | <b>Applicability judgement</b>                                                                                          |        | <b>Low</b>              | <b>Match review question</b>                                                                                                                                                                                                                                                                                                                                                                                                                                                        |  |
| <b>4. Flow and timing</b>    | 4.1 Was there an appropriate interval between index test(s) and reference standard?                                     |        | Unclear                 | Patients with previous therapy of HCC, HCV were excluded.                                                                                                                                                                                                                                                                                                                                                                                                                           |  |
|                              | 4.2 Did all patients receive a reference standard?                                                                      |        | Yes                     |                                                                                                                                                                                                                                                                                                                                                                                                                                                                                     |  |
|                              | 4.3 Did patients receive the same reference standard?                                                                   |        | Yes                     | Assume same reference test                                                                                                                                                                                                                                                                                                                                                                                                                                                          |  |
|                              | 4.4 Were all patients included in the analysis?                                                                         |        | Yes                     |                                                                                                                                                                                                                                                                                                                                                                                                                                                                                     |  |
|                              | <b>Risk of bias judgement</b>                                                                                           |        | <b>Low</b>              | <b>All patients received same reference test, and all included in the analysis.</b>                                                                                                                                                                                                                                                                                                                                                                                                 |  |

**Table S8.10 Risk of bias assessment of the candidate lncRNA studies**

| Study ID                     | P_076                                                                                                                   | Author | Roshdy et al., 2020  | Assessor                                                                                                                                                                                                                                                                                                                                                                                                     |  |
|------------------------------|-------------------------------------------------------------------------------------------------------------------------|--------|----------------------|--------------------------------------------------------------------------------------------------------------------------------------------------------------------------------------------------------------------------------------------------------------------------------------------------------------------------------------------------------------------------------------------------------------|--|
| Domain                       | Signalling question                                                                                                     |        | Response             | Comments                                                                                                                                                                                                                                                                                                                                                                                                     |  |
| <b>1. Patient selection</b>  | 1.1 Was a consecutive or random sample of patients enrolled?                                                            |        | Unclear              | Diagnosis of HCC was depending upon the presence of focal hepatic lesions diagnosed by abdominal ultrasound and confirmed by triphasic spiral CT and/or MRI according to the American Association for the Study of Liver Diseases (AASLD) 2011 guidelines. Exclusion criteria included any concomitant cause CLD, malignancies other than HCC. Age- and sex-matched healthy adults served as a control group |  |
|                              | 1.2 Was a case-control design avoided?                                                                                  |        | -                    |                                                                                                                                                                                                                                                                                                                                                                                                              |  |
|                              | 1.3 Did the study avoid inappropriate exclusions?                                                                       |        | Yes                  |                                                                                                                                                                                                                                                                                                                                                                                                              |  |
|                              | <b>Risk of bias judgement</b>                                                                                           |        | <b>Low</b>           | <b>Matched controls, clear case definition</b>                                                                                                                                                                                                                                                                                                                                                               |  |
|                              | 1.4 Is there concern that the included patients do not match the review question?                                       |        | No                   | -                                                                                                                                                                                                                                                                                                                                                                                                            |  |
|                              | <b>Applicability judgement</b>                                                                                          |        | <b>Low</b>           | <b>Match review question</b>                                                                                                                                                                                                                                                                                                                                                                                 |  |
|                              |                                                                                                                         |        |                      |                                                                                                                                                                                                                                                                                                                                                                                                              |  |
| <b>2. Index test(s)</b>      | 2.1 Were the index test results interpreted without knowledge of the results of the reference standard?                 |        | Unclear              | NI                                                                                                                                                                                                                                                                                                                                                                                                           |  |
|                              | 2.2 If a threshold was used, was it pre-specified?                                                                      |        | No                   | Not pre-specified                                                                                                                                                                                                                                                                                                                                                                                            |  |
|                              | <b>Risk of bias judgement</b>                                                                                           |        | <b>Some concerns</b> | <b>Not pre-specified threshold and no evidence of blinding in result interpretation.</b>                                                                                                                                                                                                                                                                                                                     |  |
|                              | 2.3 Is there concern that the index test, its conduct, or interpretation differ from the review question?               |        | No                   | -                                                                                                                                                                                                                                                                                                                                                                                                            |  |
|                              | <b>Applicability judgement</b>                                                                                          |        | <b>Low</b>           | <b>Match review question</b>                                                                                                                                                                                                                                                                                                                                                                                 |  |
| <b>3. Reference standard</b> | 3.1 Is the reference standard likely to correctly classify the target condition?                                        |        | Yes                  | clear case definition.                                                                                                                                                                                                                                                                                                                                                                                       |  |
|                              | 3.2 Were the reference standard results interpreted without knowledge of the results of the index test?                 |        | Unclear              | NI                                                                                                                                                                                                                                                                                                                                                                                                           |  |
|                              | <b>Risk of bias judgement</b>                                                                                           |        | <b>Low</b>           | <b>clear case definition but the research question was on HCV-induced HCC.</b>                                                                                                                                                                                                                                                                                                                               |  |
|                              | 3.3 Is there concern that the target condition as defined by the reference standard does not match the review question? |        | No                   | -                                                                                                                                                                                                                                                                                                                                                                                                            |  |
|                              | <b>Applicability judgement</b>                                                                                          |        | <b>Low</b>           | <b>Match review question</b>                                                                                                                                                                                                                                                                                                                                                                                 |  |
| <b>4. Flow and timing</b>    | 4.1 Was there an appropriate interval between index test(s) and reference standard?                                     |        | Unclear              | Patients did not receive any specific treatment for HCV during the last 6 months.                                                                                                                                                                                                                                                                                                                            |  |
|                              | 4.2 Did all patients receive a reference standard?                                                                      |        | Yes                  |                                                                                                                                                                                                                                                                                                                                                                                                              |  |
|                              | 4.3 Did patients receive the same reference standard?                                                                   |        | Yes                  |                                                                                                                                                                                                                                                                                                                                                                                                              |  |
|                              | 4.4 Were all patients included in the analysis?                                                                         |        | Yes                  |                                                                                                                                                                                                                                                                                                                                                                                                              |  |
|                              | <b>Risk of bias judgement</b>                                                                                           |        | <b>Some concerns</b> | <b>All patients received same reference test, but no evidence of no HCC treatment before enrolment.</b>                                                                                                                                                                                                                                                                                                      |  |

**Table S8.11 Risk of bias assessment of the candidate lncRNA studies**

| Study ID                     | P_077                                                                                                                   | Author | Shaker et al., 2020  | Assessor                                                                                                         |  |
|------------------------------|-------------------------------------------------------------------------------------------------------------------------|--------|----------------------|------------------------------------------------------------------------------------------------------------------|--|
| Domain                       | Signalling question                                                                                                     |        | Response             | Comments                                                                                                         |  |
| <b>1. Patient selection</b>  | 1.1 Was a consecutive or random sample of patients enrolled?                                                            |        | Unclear              | 50 HCC patients on top of HCV chronically infected Egyptian patients. 45 healthy volunteers serving as controls. |  |
|                              | 1.2 Was a case-control design avoided?                                                                                  |        | -                    |                                                                                                                  |  |
|                              | 1.3 Did the study avoid inappropriate exclusions?                                                                       |        | No                   |                                                                                                                  |  |
|                              | <b>Risk of bias judgement</b>                                                                                           |        | <b>Some concerns</b> | Unclear case definition of HCC and unmatched controls                                                            |  |
|                              | 1.4 Is there concern that the included patients do not match the review question?                                       |        | No                   | -                                                                                                                |  |
|                              | <b>Applicability judgement</b>                                                                                          |        | <b>Low</b>           | <b>Still HCC, but render some unclear information.</b>                                                           |  |
| <b>2. Index test(s)</b>      | 2.1 Were the index test results interpreted without knowledge of the results of the reference standard?                 |        | Unclear              | NI                                                                                                               |  |
|                              | 2.2 If a threshold was used, was it pre-specified?                                                                      |        | No                   | Not pre-specified                                                                                                |  |
|                              | <b>Risk of bias judgement</b>                                                                                           |        | <b>Some concerns</b> | <b>Not pre-specified threshold and no evidence of blinding in result interpretation.</b>                         |  |
|                              | 2.3 Is there concern that the index test, its conduct, or interpretation differ from the review question?               |        | No                   | -                                                                                                                |  |
|                              | <b>Applicability judgement</b>                                                                                          |        | <b>Low</b>           | <b>Match review question</b>                                                                                     |  |
| <b>3. Reference standard</b> | 3.1 Is the reference standard likely to correctly classify the target condition?                                        |        | Unclear              | Unclear diagnostic definition.                                                                                   |  |
|                              | 3.2 Were the reference standard results interpreted without knowledge of the results of the index test?                 |        | Unclear              | NI                                                                                                               |  |
|                              | <b>Risk of bias judgement</b>                                                                                           |        | <b>Some concerns</b> | <b>Unclear diagnostic definition.</b>                                                                            |  |
|                              | 3.3 Is there concern that the target condition as defined by the reference standard does not match the review question? |        | No                   | -                                                                                                                |  |
|                              | <b>Applicability judgement</b>                                                                                          |        | <b>Low</b>           | <b>Match review question</b>                                                                                     |  |
| <b>4. Flow and timing</b>    | 4.1 Was there an appropriate interval between index test(s) and reference standard?                                     |        | Unclear              | NI                                                                                                               |  |
|                              | 4.2 Did all patients receive a reference standard?                                                                      |        | Unclear              | NI                                                                                                               |  |
|                              | 4.3 Did patients receive the same reference standard?                                                                   |        | Unclear              | NI                                                                                                               |  |
|                              | 4.4 Were all patients included in the analysis?                                                                         |        | Unclear              | Baseline demographic of control was not reported.                                                                |  |
|                              | <b>Risk of bias judgement</b>                                                                                           |        | <b>Some concerns</b> | <b>Some baseline was not reported, and no information of treatment received before blood collection.</b>         |  |

**Table S8.12 Risk of bias assessment of the candidate lncRNA studies**

| Study ID              | P_086                                                                                                                   | Author | Kim et al., 2021 | Assessor                                                                                                                                                                                                                                    |  |
|-----------------------|-------------------------------------------------------------------------------------------------------------------------|--------|------------------|---------------------------------------------------------------------------------------------------------------------------------------------------------------------------------------------------------------------------------------------|--|
| Domain                | Signalling question                                                                                                     |        | Response         | Comments                                                                                                                                                                                                                                    |  |
| 1. Patient selection  | 1.1 Was a consecutive or random sample of patients enrolled?                                                            |        | Unclear          | HCC was diagnosed according to the American Association for the Study of Liver Diseases practice guideline. Healthy controls were defined as 18- to 50-year-old subjects with no past medical history who attended regular medical check-up |  |
|                       | 1.2 Was a case-control design avoided?                                                                                  |        | -                |                                                                                                                                                                                                                                             |  |
|                       | 1.3 Did the study avoid inappropriate exclusions?                                                                       |        | No               |                                                                                                                                                                                                                                             |  |
|                       | Risk of bias judgement                                                                                                  |        | Low              | Unmatched controls, clear case definition                                                                                                                                                                                                   |  |
|                       | 1.4 Is there concern that the included patients do not match the review question?                                       |        | No               | -                                                                                                                                                                                                                                           |  |
|                       | Applicability judgement                                                                                                 |        | Low              | Match review question                                                                                                                                                                                                                       |  |
| 2. Index test(s)      | 2.1 Were the index test results interpreted without knowledge of the results of the reference standard?                 |        | Unclear          | NI                                                                                                                                                                                                                                          |  |
|                       | 2.2 If a threshold was used, was it pre-specified?                                                                      |        | No               | Not pre-specified                                                                                                                                                                                                                           |  |
|                       | Risk of bias judgement                                                                                                  |        | Some concerns    | Not pre-specified threshold and no evidence of blinding in result interpretation.                                                                                                                                                           |  |
|                       | 2.3 Is there concern that the index test, its conduct, or interpretation differ from the review question?               |        | No               | -                                                                                                                                                                                                                                           |  |
|                       | Applicability judgement                                                                                                 |        | Low              | Match review question                                                                                                                                                                                                                       |  |
| 3. Reference standard | 3.1 Is the reference standard likely to correctly classify the target condition?                                        |        | Yes              | Clear diagnostic criteria.                                                                                                                                                                                                                  |  |
|                       | 3.2 Were the reference standard results interpreted without knowledge of the results of the index test?                 |        | Unclear          | NI                                                                                                                                                                                                                                          |  |
|                       | Risk of bias judgement                                                                                                  |        | Low              | Clear diagnostic criteria.                                                                                                                                                                                                                  |  |
|                       | 3.3 Is there concern that the target condition as defined by the reference standard does not match the review question? |        | No               | -                                                                                                                                                                                                                                           |  |
|                       | Applicability judgement                                                                                                 |        | Low              | Match review question                                                                                                                                                                                                                       |  |
| 4. Flow and timing    | 4.1 Was there an appropriate interval between index test(s) and reference standard?                                     |        | Unclear          | NI                                                                                                                                                                                                                                          |  |
|                       | 4.2 Did all patients receive a reference standard?                                                                      |        | Yes              | Probably yes                                                                                                                                                                                                                                |  |
|                       | 4.3 Did patients receive the same reference standard?                                                                   |        | Yes              | Probably yes                                                                                                                                                                                                                                |  |
|                       | 4.4 Were all patients included in the analysis?                                                                         |        | No               | Some was reported.                                                                                                                                                                                                                          |  |
|                       | Risk of bias judgement                                                                                                  |        | Some concerns    | Expression level was reported only in some cases, and no information of treatment received before blood collection.                                                                                                                         |  |

**Table S8.13 Risk of bias assessment of the candidate lncRNA studies**

| Study ID              | P_099                                                                                                                   | Author | El-Shendidi et al., 2022 | Assessor                                                                                                                                                                                                                                                                                                                                                                                                            |  |
|-----------------------|-------------------------------------------------------------------------------------------------------------------------|--------|--------------------------|---------------------------------------------------------------------------------------------------------------------------------------------------------------------------------------------------------------------------------------------------------------------------------------------------------------------------------------------------------------------------------------------------------------------|--|
| Domain                | Signalling question                                                                                                     |        | Response                 | Comments                                                                                                                                                                                                                                                                                                                                                                                                            |  |
| 1. Patient selection  | 1.1 Was a consecutive or random sample of patients enrolled?                                                            |        | Unclear                  | Cases were newly diagnosed HCC on top of hepatitis C virus (HCV)-related liver cirrhosis, divided into tumor stages according to the Barcelona Clinic Liver Cancer Exclusion criteria were non-HCC hepatic malignancy, extra-hepatic malignancy, other causes of liver disease, and previous surgical, locoregional or systemic therapies of HCC. Healthy subjects with no evidence of liver disease were controls. |  |
|                       | 1.2 Was a case-control design avoided?                                                                                  |        | -                        |                                                                                                                                                                                                                                                                                                                                                                                                                     |  |
|                       | 1.3 Did the study avoid inappropriate exclusions?                                                                       |        | Yes                      |                                                                                                                                                                                                                                                                                                                                                                                                                     |  |
|                       | Risk of bias judgement                                                                                                  |        | Low                      | Unmatched controls, but clear definition of cases.                                                                                                                                                                                                                                                                                                                                                                  |  |
|                       | 1.4 Is there concern that the included patients do not match the review question?                                       |        | No                       | -                                                                                                                                                                                                                                                                                                                                                                                                                   |  |
|                       | Applicability judgement                                                                                                 |        | Low                      | Match review question                                                                                                                                                                                                                                                                                                                                                                                               |  |
|                       |                                                                                                                         |        |                          |                                                                                                                                                                                                                                                                                                                                                                                                                     |  |
| 2. Index test(s)      | 2.1 Were the index test results interpreted without knowledge of the results of the reference standard?                 |        | Unclear                  | NI                                                                                                                                                                                                                                                                                                                                                                                                                  |  |
|                       | 2.2 If a threshold was used, was it pre-specified?                                                                      |        | No                       | Not pre-specified                                                                                                                                                                                                                                                                                                                                                                                                   |  |
|                       | Risk of bias judgement                                                                                                  |        | Some concerns            | Not pre-specified threshold and no evidence of blinding in result interpretation.                                                                                                                                                                                                                                                                                                                                   |  |
|                       | 2.3 Is there concern that the index test, its conduct, or interpretation differ from the review question?               |        | No                       | -                                                                                                                                                                                                                                                                                                                                                                                                                   |  |
|                       | Applicability judgement                                                                                                 |        | Low                      | Match review question                                                                                                                                                                                                                                                                                                                                                                                               |  |
| 3. Reference standard | 3.1 Is the reference standard likely to correctly classify the target condition?                                        |        | Yes                      | Clear diagnostic criteria. (The diagnosis of HCC was confirmed by triphasic CT and/or dynamic MRI).                                                                                                                                                                                                                                                                                                                 |  |
|                       | 3.2 Were the reference standard results interpreted without knowledge of the results of the index test?                 |        | Unclear                  | NI                                                                                                                                                                                                                                                                                                                                                                                                                  |  |
|                       | Risk of bias judgement                                                                                                  |        | Low                      | Clear diagnostic criteria.                                                                                                                                                                                                                                                                                                                                                                                          |  |
|                       | 3.3 Is there concern that the target condition as defined by the reference standard does not match the review question? |        | No                       | -                                                                                                                                                                                                                                                                                                                                                                                                                   |  |
|                       | Applicability judgement                                                                                                 |        | Low                      | Match review question                                                                                                                                                                                                                                                                                                                                                                                               |  |
| 4. Flow and timing    | 4.1 Was there an appropriate interval between index test(s) and reference standard?                                     |        | Yes                      | Cases included newly diagnosed HCC patients. Previous surgical, locoregional or systemic therapies of HCC were excluded.                                                                                                                                                                                                                                                                                            |  |
|                       | 4.2 Did all patients receive a reference standard?                                                                      |        | Yes                      |                                                                                                                                                                                                                                                                                                                                                                                                                     |  |
|                       | 4.3 Did patients receive the same reference standard?                                                                   |        | Yes                      |                                                                                                                                                                                                                                                                                                                                                                                                                     |  |
|                       | 4.4 Were all patients included in the analysis?                                                                         |        | Yes                      | N analysed as recruited.                                                                                                                                                                                                                                                                                                                                                                                            |  |
|                       | Risk of bias judgement                                                                                                  |        | Low                      | No treatment before blood collection and all samples were analysed.                                                                                                                                                                                                                                                                                                                                                 |  |

**Table S8.14 Risk of bias assessment of the candidate lncRNA studies**

| Study ID              | P_107                                                                                                                   | Author | Lou et al., 2022 | Assessor                                                                                                                                                                                                                                                                           |  |
|-----------------------|-------------------------------------------------------------------------------------------------------------------------|--------|------------------|------------------------------------------------------------------------------------------------------------------------------------------------------------------------------------------------------------------------------------------------------------------------------------|--|
| Domain                | Signalling question                                                                                                     |        | Response         | Comments                                                                                                                                                                                                                                                                           |  |
| 1. Patient selection  | 1.1 Was a consecutive or random sample of patients enrolled?                                                            |        | Unclear          | Diagnosis of HCC was based on clinical symptoms, serum AFP levels, imaging and histology examination. Patients with a history of other tumours, and those receiving radiotherapy or chemotherapy were excluded from the study. Healthy subjects identified by physical examination |  |
|                       | 1.2 Was a case-control design avoided?                                                                                  |        |                  |                                                                                                                                                                                                                                                                                    |  |
|                       | 1.3 Did the study avoid inappropriate exclusions?                                                                       |        |                  |                                                                                                                                                                                                                                                                                    |  |
|                       | Risk of bias judgement                                                                                                  |        | Low              | Clear case definition, still unmatched controls.                                                                                                                                                                                                                                   |  |
|                       | 1.4 Is there concern that the included patients do not match the review question?                                       |        | No               | -                                                                                                                                                                                                                                                                                  |  |
|                       | Applicability judgement                                                                                                 |        | Low              | Match review question                                                                                                                                                                                                                                                              |  |
| 2. Index test(s)      | 2.1 Were the index test results interpreted without knowledge of the results of the reference standard?                 |        | Unclear          | NI                                                                                                                                                                                                                                                                                 |  |
|                       | 2.2 If a threshold was used, was it pre-specified?                                                                      |        | No               | Not pre-specified                                                                                                                                                                                                                                                                  |  |
|                       | Risk of bias judgement                                                                                                  |        | Some concerns    | Not pre-specified threshold and no evidence of blinding in result interpretation.                                                                                                                                                                                                  |  |
|                       | 2.3 Is there concern that the index test, its conduct, or interpretation differ from the review question?               |        | No               | -                                                                                                                                                                                                                                                                                  |  |
|                       | Applicability judgement                                                                                                 |        | Low              | Match review question                                                                                                                                                                                                                                                              |  |
| 3. Reference standard | 3.1 Is the reference standard likely to correctly classify the target condition?                                        |        | Yes              | Diagnosis of HCC was based on clinical symptoms, serum AFP levels, imaging studies (ultrasound, CT, and MRI) and histopathological examination.                                                                                                                                    |  |
|                       | 3.2 Were the reference standard results interpreted without knowledge of the results of the index test?                 |        | Unclear          | NI                                                                                                                                                                                                                                                                                 |  |
|                       | Risk of bias judgement                                                                                                  |        | Low              | Clear diagnostic criteria.                                                                                                                                                                                                                                                         |  |
|                       | 3.3 Is there concern that the target condition as defined by the reference standard does not match the review question? |        | No               | -                                                                                                                                                                                                                                                                                  |  |
|                       | Applicability judgement                                                                                                 |        | Low              | Match review question                                                                                                                                                                                                                                                              |  |
| 4. Flow and timing    | 4.1 Was there an appropriate interval between index test(s) and reference standard?                                     |        | Yes              | Serum samples were collected from 34 HCC patients before and one week after surgery                                                                                                                                                                                                |  |
|                       | 4.2 Did all patients receive a reference standard?                                                                      |        | Yes              |                                                                                                                                                                                                                                                                                    |  |
|                       | 4.3 Did patients receive the same reference standard?                                                                   |        | Yes              |                                                                                                                                                                                                                                                                                    |  |
|                       | 4.4 Were all patients included in the analysis?                                                                         |        | Yes              | N analysed as recruited.                                                                                                                                                                                                                                                           |  |
|                       | Risk of bias judgement                                                                                                  |        | Low              | No treatment before blood collection, the after-treatment samples were analysed separately and all samples were analysed.                                                                                                                                                          |  |



**Table S8.15 Risk of bias assessment of the candidate lncRNA studies**

| Study ID              | P_065                                                                                                                   | Author | Mohammed et al., 2022 | Assessor                                                                                                                                                                                                                                                                                                   |  |
|-----------------------|-------------------------------------------------------------------------------------------------------------------------|--------|-----------------------|------------------------------------------------------------------------------------------------------------------------------------------------------------------------------------------------------------------------------------------------------------------------------------------------------------|--|
| Domain                | Signalling question                                                                                                     |        | Response              | Comments                                                                                                                                                                                                                                                                                                   |  |
| 1. Patient selection  | 1.1 Was a consecutive or random sample of patients enrolled?                                                            |        | Unclear               | Diagnosis of the patients depended on history and imaging (CT, MRI). Patients were excluded if they had non-alcoholic steatohepatitis, malignancies other than HCC, diabetes, or autoimmune hepatitis. Control group consisted of 110 healthy individuals of matched age and sex with no history of cancer |  |
|                       | 1.2 Was a case-control design avoided?                                                                                  |        | -                     |                                                                                                                                                                                                                                                                                                            |  |
|                       | 1.3 Did the study avoid inappropriate exclusions?                                                                       |        | Yes                   |                                                                                                                                                                                                                                                                                                            |  |
|                       | Risk of bias judgement                                                                                                  |        | Low                   | Matched control and very clear case definition.                                                                                                                                                                                                                                                            |  |
|                       | 1.4 Is there concern that the included patients do not match the review question?                                       |        | No                    | -                                                                                                                                                                                                                                                                                                          |  |
|                       | Applicability judgement                                                                                                 |        | Low                   | Match review question                                                                                                                                                                                                                                                                                      |  |
|                       |                                                                                                                         |        |                       |                                                                                                                                                                                                                                                                                                            |  |
| 2. Index test(s)      | 2.1 Were the index test results interpreted without knowledge of the results of the reference standard?                 |        | Unclear               | NI                                                                                                                                                                                                                                                                                                         |  |
|                       | 2.2 If a threshold was used, was it pre-specified?                                                                      |        | No                    | Not pre-specified.                                                                                                                                                                                                                                                                                         |  |
|                       | Risk of bias judgement                                                                                                  |        | Some concerns         | Not pre-specified threshold and no blind of result interpretation.                                                                                                                                                                                                                                         |  |
|                       | 2.3 Is there concern that the index test, its conduct, or interpretation differ from the review question?               |        | No                    | -                                                                                                                                                                                                                                                                                                          |  |
|                       | Applicability judgement                                                                                                 |        | Low                   | Match review question                                                                                                                                                                                                                                                                                      |  |
| 3. Reference standard | 3.1 Is the reference standard likely to correctly classify the target condition?                                        |        | Yes                   |                                                                                                                                                                                                                                                                                                            |  |
|                       | 3.2 Were the reference standard results interpreted without knowledge of the results of the index test?                 |        | Unclear               | NI                                                                                                                                                                                                                                                                                                         |  |
|                       | Risk of bias judgement                                                                                                  |        | Low                   | Clear case definition.                                                                                                                                                                                                                                                                                     |  |
|                       | 3.3 Is there concern that the target condition as defined by the reference standard does not match the review question? |        | No                    | -                                                                                                                                                                                                                                                                                                          |  |
|                       | Applicability judgement                                                                                                 |        | Low                   | Match review question                                                                                                                                                                                                                                                                                      |  |
| 4. Flow and timing    | 4.1 Was there an appropriate interval between index test(s) and reference standard?                                     |        | Yes                   | All patients were newly diagnosed and had not received chemotherapy or radiotherapy treatment before enrolment.                                                                                                                                                                                            |  |
|                       | 4.2 Did all patients receive a reference standard?                                                                      |        | Yes                   |                                                                                                                                                                                                                                                                                                            |  |
|                       | 4.3 Did patients receive the same reference standard?                                                                   |        | Yes                   |                                                                                                                                                                                                                                                                                                            |  |
|                       | 4.4 Were all patients included in the analysis?                                                                         |        | Yes                   |                                                                                                                                                                                                                                                                                                            |  |
|                       | Risk of bias judgement                                                                                                  |        | Low                   | All patients received same reference test, no prior treatment and included in the analysis.                                                                                                                                                                                                                |  |

## References

1. Xie, H.; Ma, H.; Zhou, D., Plasma HULC as a promising novel biomarker for the detection of hepatocellular carcinoma. *Biomed Res Int* **2013**, 2013, 136106.
2. Li, J.; Wang, X.; Tang, J.; Jiang, R.; Zhang, W.; Ji, J.; Sun, B., HULC and Linc00152 Act as Novel Biomarkers in Predicting Diagnosis of Hepatocellular Carcinoma. *Cell Physiol Biochem* **2015**, 37, (2), 687-96.
3. Lu, J.; Xie, F.; Geng, L.; Shen, W.; Sui, C.; Yang, J., Investigation of serum lncRNA-uc003wbd and lncRNA-AF085935 expression profile in patients with hepatocellular carcinoma and HBV. *Tumour Biol* **2015**, 36, (5), 3231-6.
4. Tang, J.; Jiang, R.; Deng, L.; Zhang, X.; Wang, K.; Sun, B., Circulation long non-coding RNAs act as biomarkers for predicting tumorigenesis and metastasis in hepatocellular carcinoma. *Oncotarget* **2015**, 6, (6), 4505-15.
5. Wang, K.; Guo, W. X.; Li, N.; Gao, C. F.; Shi, J.; Tang, Y. F.; Shen, F.; Wu, M. C.; Liu, S. R.; Cheng, S. Q., Serum lncRNAs Profiles Serve as Novel Potential Biomarkers for the Diagnosis of HBV-Positive Hepatocellular Carcinoma. *PLoS One* **2015**, 10, (12), e0144934.
6. El-Tawdi, A. H.; Matboli, M.; El-Nakeep, S.; Azazy, A. E.; Abdel-Rahman, O., Association of long noncoding RNA and c-JUN expression in hepatocellular carcinoma. *Expert Rev Gastroenterol Hepatol* **2016**, 10, (7), 869-77.
7. El-Tawdi, A. H.; Matboli, M.; Shehata, H. H.; Tash, F.; El-Khazragy, N.; Azazy Ael, S.; Abdel-Rahman, O., Evaluation of Circulatory RNA-Based Biomarker Panel in Hepatocellular Carcinoma. *Mol Diagn Ther* **2016**, 20, (3), 265-77.
8. Huang, R.; Wang, X.; Zhang, W.; Zhangyuan, G.; Jin, K.; Yu, W.; Xie, Y.; Xu, X.; Wang, H.; Sun, B., Down-Regulation of lncRNA DGCR5 Correlates with Poor Prognosis in Hepatocellular Carcinoma. *Cell Physiol Biochem* **2016**, 40, (3), 707-715.
9. Jing, W.; Gao, S.; Zhu, M.; Luo, P.; Jing, X.; Chai, H.; Tu, J., Potential diagnostic value of lncRNA SPRY4-IT1 in hepatocellular carcinoma. *Oncol Rep* **2016**, 36, (2), 1085-92.
10. Kamel, M. M.; Matboli, M.; Sallam, M.; Montasser, I. F.; Saad, A. S.; El-Tawdi, A. H. F., Investigation of long noncoding RNAs expression profile as potential serum biomarkers in patients with hepatocellular carcinoma. *Transl Res* **2016**, 168, 134-145.
11. Ma, X.; Wang, X.; Yang, C.; Wang, Z.; Han, B.; Wu, L.; Zhuang, L., DANCR Acts as a Diagnostic Biomarker and Promotes Tumor Growth and Metastasis in Hepatocellular Carcinoma. *Anticancer Res* **2016**, 36, (12), 6389-6398.
12. Yu, J.; Han, J.; Zhang, J.; Li, G.; Liu, H.; Cui, X.; Xu, Y.; Li, T.; Liu, J.; Wang, C., The long noncoding RNAs PVT1 and uc002mbe.2 in sera provide a new supplementary method for hepatocellular carcinoma diagnosis. *Medicine (Baltimore)* **2016**, 95, (31), e4436.
13. Cao, S. W.; Huang, J. L.; Chen, J.; Hu, Y. W.; Hu, X. M.; Ren, T. Y.; Zheng, S. H.; Lin, J. D.; Tang, J.; Zheng, L.; Wang, Q., Long non-coding RNA UBE2CP3 promotes tumor metastasis by inducing epithelial-mesenchymal transition in hepatocellular carcinoma. *Oncotarget* **2017**, 8, (39), 65370-65385.
14. Chen, C. S.; Yan, H. L.; Wang, H. J.; Zhou, Y.; Ren, L.; Hou, L. Z.; Yangdan, C. R.; Fan, H. N., *Academic Journal of Second Military Medical University* **2017**, 38, (5), 683-686.
15. Ma, W.; Wang, H.; Jing, W.; Zhou, F.; Chang, L.; Hong, Z.; Liu, H.; Liu, Z.; Yuan, Y., Downregulation of long non-coding RNAs JPX and XIST is associated with the prognosis of hepatocellular carcinoma. *Clin Res Hepatol Gastroenterol* **2017**, 41, (2), 163-170.

16. Qin, Y.; Wu, J.; Ke, Z.; Xu, J., Expression of plasma lncRNA BANCR in hepatocellular carcinoma and its diagnostic and prognostic significance. *International Journal of Clinical and Experimental Medicine* **2017**, 10, (8), 11984-11990.
17. Yuan, W.; Sun, Y.; Liu, L.; Zhou, B.; Wang, S.; Gu, D., Circulating lncRNAs Serve as Diagnostic Markers for Hepatocellular Carcinoma. *Cell Physiol Biochem* **2017**, 44, (1), 125-132.
18. Abd El Gwad, A.; Matboli, M.; El-Tawdi, A.; Habib, E. K.; Shehata, H.; Ibrahim, D.; Tash, F., Role of exosomal competing endogenous RNA in patients with hepatocellular carcinoma. *J Cell Biochem* **2018**, 119, (10), 8600-8610.
19. Gao, S.; Xu, X.; Wang, Y.; Zhang, W.; Wang, X., Diagnostic utility of plasma lncRNA small nucleolar RNA host gene 1 in patients with hepatocellular carcinoma. *Mol Med Rep* **2018**, 18, (3), 3305-3313.
20. Gong, L.; Zhu, X.; Zhang, W.; Ni, H.; Yin, W.; Fu, M., Plasma lncRNAs acting as fingerprints in predicting hepatocellular carcinoma from hbv positive chronic hepatitis. *International Journal of Clinical and Experimental Medicine* **2018**, 11, (11), 12088-12096.
21. Gramantieri, L.; Baglioni, M.; Fornari, F.; Laginestra, M. A.; Ferracin, M.; Indio, V.; Ravaoli, M.; Cescon, M.; De Pace, V.; Leoni, S.; Coada, C. A.; Negrini, M.; Bolondi, L.; Giovannini, C., lncRNAs as novel players in hepatocellular carcinoma recurrence. *Oncotarget* **2018**, 9, (80), 35085-35099.
22. Huang, L.; Li, X.; Gao, W., Long non-coding RNA linc-ITGB1 promotes cell proliferation, migration, and invasion in human hepatoma carcinoma by up-regulating ROCK1. *Biosci Rep* **2018**, 38, (5).
23. Li, B.; Mao, R.; Liu, C.; Zhang, W.; Tang, Y.; Guo, Z., lncRNA FAL1 promotes cell proliferation and migration by acting as a CeRNA of miR-1236 in hepatocellular carcinoma cells. *Life Sci* **2018**, 197, 122-129.
24. Luo, P.; Liang, C.; Zhang, X.; Liu, X.; Wang, Y.; Wu, M.; Feng, X.; Tu, J., Identification of long non-coding RNA ZFAS1 as a novel biomarker for diagnosis of HCC. *Biosci Rep* **2018**, 38, (4).
25. Sun, L.; Su, Y.; Liu, X.; Xu, M.; Chen, X.; Zhu, Y.; Guo, Z.; Bai, T.; Dong, L.; Wei, C.; Cai, X.; He, B.; Pan, Y.; Sun, H.; Wang, S., Serum and exosome long non coding RNAs as potential biomarkers for hepatocellular carcinoma. *Journal of Cancer* **2018**, 9, (15), 2631-2639.
26. Wang, Y.; Jing, W.; Ma, W.; Liang, C.; Chai, H.; Tu, J., Down-regulation of long non-coding RNA GAS5-AS1 and its prognostic and diagnostic significance in hepatocellular carcinoma. *Cancer Biomark* **2018**, 22, (2), 227-236.
27. Wang, Z. F.; Hu, R.; Pang, J. M.; Zhang, G. Z.; Yan, W.; Li, Z. N., Serum long noncoding rna lrb1 as a potential biomarker for predicting the diagnosis and prognosis of human hepatocellular carcinoma. *Oncology Letters* **2018**, 16, (2), 1593-1601.
28. Xie, Z.; Zhou, F.; Yang, Y.; Li, L.; Lei, Y.; Lin, X.; Li, H.; Pan, X.; Chen, J.; Wang, G.; Liu, H.; Jiang, J.; Wu, B., lnc-PCDH9-13:1 Is a Hypersensitive and Specific Biomarker for Early Hepatocellular Carcinoma. *EBioMedicine* **2018**, 33, 57-67.
29. Xu, H.; Chen, Y.; Dong, X.; Wang, X., Serum Exosomal Long Noncoding RNAs ENSG00000258332.1 and LINC00635 for the Diagnosis and Prognosis of Hepatocellular Carcinoma. *Cancer Epidemiol Biomarkers Prev* **2018**, 27, (6), 710-716.

30. Zeng, B.; Lin, Z.; Ye, H.; Cheng, D.; Zhang, G.; Zhou, J.; Huang, Z.; Wang, M.; Cai, C.; Zeng, J.; Tang, C.; Liu, J., Upregulation of LncDQ is Associated with Poor Prognosis and Promotes Tumor Progression via Epigenetic Regulation of the EMT Pathway in HCC. *Cell Physiol Biochem* **2018**, 46, (3), 1122-1133.
31. Zhang, J.; Zhang, D.; Zhao, Q.; Qi, J.; Li, X.; Qin, C., A distinctively expressed long noncoding RNA, RP11-46611.1, may serve as a prognostic biomarker in hepatocellular carcinoma. *Cancer Medicine* **2018**, 7, (7), 2960-2968.
32. Zheng, Z. K.; Pang, C.; Yang, Y.; Duan, Q.; Zhang, J.; Liu, W. C., Serum long noncoding RNA urothelial carcinoma-associated 1: A novel biomarker for diagnosis and prognosis of hepatocellular carcinoma. *J Int Med Res* **2018**, 46, (1), 348-356.
33. Cao, S. Q.; Zheng, H.; Sun, B. C.; Wang, Z. L.; Liu, T.; Guo, D. H.; Shen, Z. Y., Long non-coding rna highly up-regulated in liver cancer promotes exosome secretion. *World Journal of Gastroenterology* **2019**, 25, (35), 5283-5299.
34. Chao, Y.; Zhou, D., lncRNA-D16366 Is a Potential Biomarker for Diagnosis and Prognosis of Hepatocellular Carcinoma. *Med Sci Monit* **2019**, 25, 6581-6586.
35. Dong, H.; Zhang, Y.; Xu, Y.; Ma, R.; Liu, L.; Luo, C.; Jiang, W., Downregulation of long non-coding RNA MEG3 promotes proliferation, migration, and invasion of human hepatocellular carcinoma cells by upregulating TGF- $\beta$ 1. *Acta Biochim Biophys Sin (Shanghai)* **2019**, 51, (6), 645-652.
36. Habieb, A.; Matboli, M.; El-Tayeb, H.; El-Asmar, F., Potential role of lncRNA-TSIX, miR-548-a-3p, and SOGA1 mRNA in the diagnosis of hepatocellular carcinoma. *Mol Biol Rep* **2019**, 46, (4), 4581-4590.
37. Motawi, T. M. K.; El-Maraghy, S. A.; Sabry, D.; Mehana, N. A., The expression of long non coding RNA genes is associated with expression with polymorphisms of HULC rs7763881 and MALAT1 rs619586 in hepatocellular carcinoma and HBV Egyptian patients. *J Cell Biochem* **2019**, 120, (9), 14645-14656.
38. Qi, J.; Li, J.; Sun, J.; Li, C., Long Non-Coding RNA IGF2AS in Serum may be a Biomarker for Diagnosis of Hepatitis B Virus-Related Hepatocellular Carcinoma. *Clin Lab* **2019**, 65, (12).
39. Refai, N. S.; Louka, M. L.; Halim, H. Y.; Montasser, I., Long non-coding RNAs (CASC2 and TUG1) in hepatocellular carcinoma: Clinical significance. *J Gene Med* **2019**, 21, (9), e3112.
40. Shaker, O. G.; Abdelwahed, M. Y.; Ahmed, N. A.; Hassan, E. A.; Ahmed, T. I.; Abousarie, M. A.; Ayoub, S. E., Evaluation of serum long noncoding RNA NEAT and MiR-129-5p in hepatocellular carcinoma. *IUBMB Life* **2019**, 71, (10), 1571-1578.
41. Wu, F.; Wang, C. X.; Tian, H., Expression and clinical significance of lncRNA ZFAS1 in serum exosomes of patients with hepatocellular carcinoma. *Chinese Journal of Cancer Prevention and Treatment* **2019**, 26, (12), 849-854.
42. Xu, X.; Gu, J.; Ding, X.; Ge, G.; Zang, X.; Ji, R.; Shao, M.; Mao, Z.; Zhang, Y.; Zhang, J.; Mao, F.; Qian, H.; Xu, W.; Cai, H.; Wang, F.; Zhang, X., LINC00978 promotes the progression of hepatocellular carcinoma by regulating EZH2-mediated silencing of p21 and E-cadherin expression. *Cell Death Dis* **2019**, 10, (10), 752.
43. Zeng, Y. L.; Guo, Z. Y.; Su, H. Z.; Zhong, F. D.; Jiang, K. Q.; Yuan, G. D., Diagnostic and prognostic value of lncRNA cancer susceptibility candidate 9 in hepatocellular carcinoma. *World J Gastroenterol* **2019**, 25, (48), 6902-6915.

44. Zeng, Z.; Dong, J.; Li, Y.; Dong, Z.; Liu, Z.; Huang, J.; Wang, Y.; Zhen, Y.; Lu, Y., The expression level and clinical significance of lncRNA X91348 in hepatocellular carcinoma. *Artif Cells Nanomed Biotechnol* **2019**, *47*, (1), 3067-3071.
45. Fang, G.; Wang, J.; Sun, X.; Xu, R.; Zhao, X.; Shao, L.; Sun, C.; Wang, Y., lncRNA MAGI2-AS3 is downregulated in the distant recurrence of hepatocellular carcinoma after surgical resection and affects migration and invasion via ROCK2. *Ann Hepatol* **2020**, *19*, (5), 535-540.
46. Huang, J.; Zheng, Y.; Xiao, X.; Liu, C.; Lin, J.; Zheng, S.; Yang, B.; Ou, Q., A Circulating Long Noncoding RNA Panel Serves as a Diagnostic Marker for Hepatocellular Carcinoma. *Dis Markers* **2020**, *2020*, 5417598.
47. Huang, X.; Sun, L.; Wen, S.; Deng, D.; Wan, F.; He, X.; Tian, L.; Liang, L.; Wei, C.; Gao, K.; Fu, Q.; Li, Y.; Jiang, J.; Zhai, R.; He, M., RNA sequencing of plasma exosomes revealed novel functional long noncoding RNAs in hepatocellular carcinoma. *Cancer Sci* **2020**, *111*, (9), 3338-3349.
48. Jiang, L.; He, Y.; Shen, G.; Ni, J.; Xia, Z.; Liu, H.; Cao, Y.; Li, X., lncRNA HAND2-AS1 mediates the downregulation of ROCK2 in hepatocellular carcinoma and inhibits cancer cell proliferation, migration and invasion. *Mol Med Rep* **2020**, *21*, (3), 1304-1309.
49. Kim, S. S.; Baek, G. O.; Ahn, H. R.; Sung, S.; Seo, C. W.; Cho, H. J.; Nam, S. W.; Cheong, J. Y.; Eun, J. W., Serum small extracellular vesicle-derived LINC00853 as a novel diagnostic marker for early hepatocellular carcinoma. *Mol Oncol* **2020**, *14*, (10), 2646-2659.
50. Li, Y.; Li, G.; Chen, X.; Huang, H.; Liao, L.; Yuan, T.; Deng, S., A novel lncRNA nonhsat053785 acts as an independent risk factor for intrahepatic metastasis of hepatocellular carcinoma. *OncoTargets and Therapy* **2020**, *13*, 5455-5466.
51. Lu, Y.; Duan, Y.; Xu, Q.; Zhang, L.; Chen, W.; Qu, Z.; Wu, B.; Liu, W.; Shi, L.; Wu, D.; Yang, Y.; Sun, D.; Chen, X., Circulating exosome-derived bona fide long non-coding RNAs predicting the occurrence and metastasis of hepatocellular carcinoma. *J Cell Mol Med* **2020**, *24*, (2), 1311-1318.
52. Matboli, M.; Labib, M. E.; Nasser, H. E. T.; El-Tawdi, A. H. F.; Habib, E. K.; Ali-Labib, R., Exosomal miR-1298 and lncRNA-rp11-583F2.2 expression in hepatocellular carcinoma. *Current Genomics* **2020**, *21*, (1), 37-46.
53. Mohyeldeen, M.; Ibrahim, S.; Shaker, O.; Helmy, H., Serum expression and diagnostic potential of long non-coding RNAs NEAT1 and TUG1 in viral hepatitis C and viral hepatitis C-associated hepatocellular carcinoma. *Clin Biochem* **2020**, *84*, 38-44.
54. Qin, S. J.; Zhou, H. Z.; Xu, N. S.; Yang, H. C.; Chen, P. X., The Diagnostic Value of Serum ST8SIA6-AS1 as Biomarker in Hepatocellular Carcinoma. *Clin Lab* **2020**, *66*, (12).
55. Roshdy, F.; Farag, M. M. S.; El-Ahwany, E.; Mahmode, O.; Mousa, A. A.; El Talkawy, M.; Essawy, F., Long non-coding RNA HOTAIR and HOTTIP as potential biomarkers for hepatitis C virus genotype 4-induced hepatocellular carcinoma. *Egyptian Journal of Medical Human Genetics* **2020**, *21*, (1).
56. Shaker, O. G.; Khairy, A. M.; Ali, R. M. M.; Badr, A. M., miRNA-141 and its target long non-coding RNA HOTAIR as diagnostic marker in hepatocellular carcinoma on top of hepatitis C virus. *Gene Reports* **2020**, *21*.

57. Song, W.; Wu, J.; Wu, L.; Zhao, H., Significance of serum lncRNA-PVT1 expression in diagnosis and prognosis of hepatocellular carcinoma. *Journal of Practical Oncology* **2020**, 35, (4), 317-321.
58. Yao, Z.; Jia, C.; Tai, Y.; Liang, H.; Zhong, Z.; Xiong, Z.; Deng, M.; Zhang, Q., Serum exosomal long noncoding RNAs lnc-FAM72D-3 and lnc-EPC1-4 as diagnostic biomarkers for hepatocellular carcinoma. *Aging (Albany NY)* **2020**, 12, (12), 11843-11863.
59. Kim, S. S.; Baek, G. O.; Son, J. A.; Ahn, H. R.; Yoon, M. K.; Cho, H. J.; Yoon, J. H.; Nam, S. W.; Cheong, J. Y.; Eun, J. W., Early detection of hepatocellular carcinoma via liquid biopsy: panel of small extracellular vesicle-derived long noncoding RNAs identified as markers. *Mol Oncol* **2021**, 15, (10), 2715-2731.
60. Tian, Q.; Yan, X.; Yang, L.; Liu, Z.; Yuan, Z.; Zhang, Y., Long non-coding RNA BACE1-AS plays an oncogenic role in hepatocellular carcinoma cells through miR-214-3p/APLN axis. *Acta Biochim Biophys Sin (Shanghai)* **2021**, 53, (11), 1538-1546.
61. Wang, T.; Zhu, H.; Xiao, M.; Zhou, S., Serum exosomal long noncoding RNA CRNDE as a prognostic biomarker for hepatocellular carcinoma. *J Clin Lab Anal* **2021**, 35, (11), e23959.
62. You, L. N.; Tai, Q. W.; Xu, L.; Hao, Y.; Guo, W. J.; Zhang, Q.; Tong, Q.; Zhang, H.; Huang, W. K., Exosomal LINC00161 promotes angiogenesis and metastasis via regulating miR-590-3p/ROCK axis in hepatocellular carcinoma. *Cancer Gene Ther* **2021**, 28, (6), 719-736.
63. Zhu, X.; Feng, Y.; He, D.; Wang, Z.; Huang, F.; Tu, J., Clinical Value and Underlying Mechanisms of Upregulated LINC00485 in Hepatocellular Carcinoma. *Frontiers in Oncology* **2021**, 11.
64. Ali, M. A.; Shaker, O. G.; Ezzat, E. M.; Eid, H. M.; Ali, D. Y.; Hassan, E. A.; Elsayed, D. H.; Abozaid, E. R.; Abdelaleem, O. O., Serum lncRNAs, NBAT-1, and FOXCUT signature in hepatocellular carcinoma developed on top of chronic hepatitis C. *Molecular Carcinogenesis* **2022**.
65. Bongolo, C. C.; Thokerunga, E.; Fidele, N. B.; Souraka, T. D. M.; Kitembo, P.; Rugera, S. P.; Worley, P. F.; Tu, J. C., Upregulation of the long non-coding RNA, LIPCAR promotes proliferation, migration, and metastasis of hepatocellular carcinoma. *Cancer Biomark* **2022**, 35, (3), 245-256.
66. Chen, J.; Tang, D.; Li, H.; Zhang, P., Expression changes of serum LINC00941 and LINC00514 in HBV infection-related liver diseases and their potential application values. *J Clin Lab Anal* **2022**, 36, (1), e24143.
67. Chen, Y.; Zhang, J.; Liu, J.; Wang, J.; Shi, C.; Lu, L.; Cheng, X.; Niu, G.; Zhang, S., The Expression and Clinical Significance of PCNAP1 in Hepatocellular Carcinoma Patients. *J Immunol Res* **2022**, 2022, 1817694.
68. El-Shendidi, A.; Ghazala, R.; Hassouna, E., Circulating HOTAIR potentially predicts hepatocellular carcinoma in cirrhotic liver and prefigures the tumor stage. *Clinical and Experimental Hepatology* **2022**, 8, (2), 139-146.
69. Fu, P.; Gong, B.; Li, H.; Luo, Q.; Huang, Z.; Shan, R.; Li, J.; Yan, S., Combined identification of three lncRNAs in serum as effective diagnostic and prognostic biomarkers for hepatitis B virus-related hepatocellular carcinoma. *Int J Cancer* **2022**, 151, (10), 1824-1834.

70. Gong, A.; Luo, X.; Tan, Y.; Chen, H.; Luo, G., High expression of C10orf91 and LINC01224 in hepatocellular carcinoma and poor prognosis. *American Journal of Translational Research* **2022**, 14, (4), 2567-2579.
71. Han, Y.; Jiang, W.; Wang, Y.; Zhao, M.; Li, Y.; Ren, L., Serum long non-coding RNA SCARNA10 serves as a potential diagnostic biomarker for hepatocellular carcinoma. *BMC Cancer* **2022**, 22, (1), 431.
72. Lou, Z. H.; Xu, K. Y.; Qiao, L.; Su, X. Q.; Ou-Yang, Y.; Miao, L. B.; Liu, F.; Wang, Y.; Fu, A.; Ren, X. H.; Huang, J. S.; Li, Z. Y.; Bao, J. F., Diagnostic Potential of the Serum lncRNAs HOTAIR, BRM and ICR for Hepatocellular Carcinoma. *Front Biosci (Landmark Ed)* **2022**, 27, (9), 264.
73. Manganelli, M.; Grossi, I.; Corsi, J.; D'Agostino, V. G.; Jurikova, K.; Cusanelli, E.; Molfino, S.; Portolani, N.; Salvi, A.; De Petro, G., Expression of Cellular and Extracellular TERRA, TERC and TERT in Hepatocellular Carcinoma. *Int J Mol Sci* **2022**, 23, (11).
74. Mo, C.; Wu, J.; Sui, J.; Deng, Y.; Li, M.; Cao, Z.; Hu, Z.; Huang, J.; Li, S., Long non-coding RNA LINC01793 as a potential diagnostic biomarker of hepatitis B virus-related hepatocellular carcinoma. *Clin Biochem* **2022**, 108, 56-62.
75. Mohammed, S. R.; Shaker, O. G.; Mohamed, M. M.; Abdelhafez Mostafa, M. N.; Gaber, S. N.; Ali, D. Y.; Hussein, H. A.; Elebiary, A. M.; Abonar, A. A.; Eid, H. M.; El Sayed Ali, H. S., The emerging role of lncRNA MEG3 and MEG3 rs7158663 in hepatocellular carcinoma. *Eur Rev Med Pharmacol Sci* **2022**, 26, (1), 11-21.
76. Yao, J.; Hua, X.; Shi, J.; Hu, X.; Lui, K.; He, K.; Mai, J.; Lan, T.; Lu, M., LncRNA THEMIS2-211, a tumor-originated circulating exosomal biomarker, promotes the growth and metastasis of hepatocellular carcinoma by functioning as a competing endogenous RNA. *Faseb j* **2022**, 36, (4), e22238.
